# Supplementary material for: Effects of artificial intelligence implementation on efficiency in medical imaging—a systematic literature review and meta-analysis
Source: Springer Nature journal article supplement (doi:10.1038/s41746-024-01248-9), 2024-09-30
Supplement: MOESM1 [file 41746_2024_1248_MOESM1_ESM.pdf]

## SUPPLEMENTS

**SUPPLEMENTARY TABLE 1: JOURNAL ARTICLES EXCLUDED DURING FULL TEXT-SCREENING**

| AUTHOR(S)          | YEAR | TITLE                                                                                                                                                               | DOI / URL                                                                                                                                                               | REASON FOR EXCLUSION          |
|--------------------|------|---------------------------------------------------------------------------------------------------------------------------------------------------------------------|-------------------------------------------------------------------------------------------------------------------------------------------------------------------------|-------------------------------|
| Alis et al.        | 2022 | A joint convolutional-recurrent neural network with an attention mechanism for detecting intracranial hemorrhage on noncontrast head CT                             | 10.1038/s41598-022-05872-x                                                                                                                                              | No outcomes of interest       |
| Annarumma et al.   | 2019 | Automated Triaging of Adult Chest Radiographs with Deep Artificial Neural Networks                                                                                  | 10.1148/radiol.2018180921                                                                                                                                               | Intervention not suitable     |
| Ardila et al.      | 2019 | End-to-end lung cancer screening with three-dimensional deep learning on low-dose chest computed tomography                                                         | 10.1038/s41591-019-0447-x                                                                                                                                               | Study design not suitable     |
| Auloge et al.      | 2019 | Augmented reality and artificial intelligence-based navigation during percutaneous vertebroplasty: a pilot randomised clinical trial                                | <a href="https://www.cochranelibrary.com/central/doi/10.1002/central/CN-02119332/full">https://www.cochranelibrary.com/central/doi/10.1002/central/CN-02119332/full</a> | Intervention not suitable     |
| Bakin et al.       | 2021 | Fast prototyping of a local fuzzy search system for decision support and retraining of hospital staff during pandemic                                               | 10.1007/s13755-021-00150-y                                                                                                                                              | Intervention not suitable     |
| Baltruschat et al. | 2021 | Smart chest X-ray worklist prioritization using artificial intelligence: a clinical workflow simulation                                                             | 10.1007/s00330-020-07480-7                                                                                                                                              | Study design not suitable     |
| Bange et al.       | 2021 | Implementing automated prognostic models to inform palliative care: more than just the algorithm                                                                    | 10.1136/bmjqs-2021-013510                                                                                                                                               | Non-eligible publication type |
| Barinov et al.     | 2019 | Impact of Data Presentation on Physician Performance Utilizing Artificial Intelligence-Based Computer-Aided Diagnosis and Decision Support Systems                  | 10.1007/s10278-018-0132-5                                                                                                                                               | Study design not suitable     |
| Bellemo et al.     | 2019 | Artificial intelligence using deep learning to screen for referable and vision-threatening diabetic retinopathy in Africa: a clinical validation study              | 10.1016/S2589-7500(19)30004-4                                                                                                                                           | No outcomes of interest       |
| Benedikt et al.    | 2018 | Concurrent Computer-Aided Detection Improves Reading Time of Digital Breast Tomosynthesis and Maintains Interpretation Performance in a Multireader Multicase Study | 10.2214/AJR.17.18185                                                                                                                                                    | Study design not suitable     |
| Beyer et al.       | 2007 | Comparison of sensitivity and reading time for the use of computer-aided detection (CAD) of pulmonary nodules at MDCT as concurrent or second reader                | 10.1007/s00330-007-0667-1                                                                                                                                               | Study design not suitable     |
| Brown et al.       | 2019 | Integration of Chest CT CAD into the Clinical Workflow and Impact on Radiologist Efficiency                                                                         | 10.1016/j.acra.2018.07.006                                                                                                                                              | Study design not suitable     |
| Buls et al.        | 2021 | Performance of an artificial intelligence tool with real-time clinical workflow integration – Detection of intracranial hemorrhage and pulmonary embolism           | 10.1016/j.ejomp.2021.03.015                                                                                                                                             | No outcomes of interest       |
| Byun et al.        | 2021 | Evaluation of deep learning-based autosegmentation in breast cancer radiotherapy                                                                                    | 10.1186/s13014-021-01923-1                                                                                                                                              | Study design not suitable     |
| Cabitza et al.     | 2021 | Studying human-AI collaboration protocols: the case of the Kasparov's law in radiological double reading                                                            | 10.1007/s13755-021-00138-8                                                                                                                                              | Study design not suitable     |
| Catchpoole et al.  | 2022 | Application of a Machine Learning-Based Decision Support Tool to Improve an Injury Surveillance System Workflow                                                     | 10.1055/a-1863-7176                                                                                                                                                     | Intervention not suitable     |

|                                         |      |                                                                                                                                                                                            |                                                                                                                                                                                                               |                           |
|-----------------------------------------|------|--------------------------------------------------------------------------------------------------------------------------------------------------------------------------------------------|---------------------------------------------------------------------------------------------------------------------------------------------------------------------------------------------------------------|---------------------------|
| Cavallo et al.                          | 2023 | Clinical Implementation of a Combined Artificial Intelligence and Natural Language Processing Quality Assurance Program for Pulmonary Nodule Detection in the Emergency Department Setting | 10.1016/j.jacr.2022.12.016                                                                                                                                                                                    | No outcomes of interest   |
| Chen J et al.                           | 2020 | Deep learning-based model for detecting 2019 novel coronavirus pneumonia on high-resolution computed tomography                                                                            | 10.1038/s41598-020-76282-0                                                                                                                                                                                    | Study design not suitable |
| Chen Y, Xing L et al.                   | 2022 | Clinical Evaluation of an Auto-Segmentation Tool for Spine SBRT Treatment                                                                                                                  | 10.3389/fonc.2022.842579                                                                                                                                                                                      | Study design not suitable |
| Chen Y, Vinogradskiy V et al.           | 2020 | Deep Learning-Based Intraprostatic Lesion Segmentation Using Multi-Parametric MRI For Prostate Radiation Therapy                                                                           | 10.1016/j.ijrobp.2020.07.2275                                                                                                                                                                                 | Study design not suitable |
| Chen N et al.                           | 2023 | A fully automatic target detection and quantification strategy based on object detection convolutional neural network YOLOv3 for one-step X-ray image grading                              | 10.1039/d2ay01526a                                                                                                                                                                                            | Study design not suitable |
| Dahlblom et al.                         | 2023 | Breast cancer screening with digital breast tomosynthesis: comparison of different reading strategies implementing artificial intelligence                                                 | 10.1007/s00330-022-09316-y                                                                                                                                                                                    | No outcomes of interest   |
| De Asis-Cruz et al.                     | 2022 | FetalGAN: Automated Segmentation of Fetal Functional Brain MRI Using Deep Generative Adversarial Learning and Multi-Scale 3D U-Net                                                         | 10.3389/fnins.2022.887634                                                                                                                                                                                     | Study design not suitable |
| Dembrower et al.                        | 2023 | Implications for downstream workload based on calibrating an artificial intelligence detection algorithm by standalone-reader or combined-reader sensitivity matching                      | 10.1117/1.JMI.10.S2.S22405                                                                                                                                                                                    | No outcomes of interest   |
| Ding et al.                             | 2020 | Measurement and identification of mental workload during simulated computer tasks with multimodal methods and machine learning                                                             | 10.1080/00140139.2020.1759699                                                                                                                                                                                 | Intervention not suitable |
| Do et al.                               | 2020 | Augmented Radiologist Workflow Improves Report Value and Saves Time: A Potential Model for Implementation of Artificial Intelligence                                                       | 10.1016/j.acra.2019.09.014                                                                                                                                                                                    | Intervention not suitable |
| Dyer et al.                             | 2021 | Diagnosis of normal chest radiographs using an autonomous deep-learning algorithm                                                                                                          | 10.1016/j.crad.2021.01.015                                                                                                                                                                                    | Study design not suitable |
| Edalati et al.                          | 2022 | Implementation and prospective clinical validation of AI-based planning and shimmming techniques in cardiac MRI                                                                            | 10.1002/mp.15327                                                                                                                                                                                              | Study design not suitable |
| Eskreis-Winkler et al.                  | 2021 | Using Deep Learning to Improve Nonsystematic Viewing of Breast Cancer on MRI                                                                                                               | 10.1093/jbi/wbaa102                                                                                                                                                                                           | Study design not suitable |
| Feng et al.                             | 2019 | Deep convolutional neural network for segmentation of thoracic organs-at-risk using cropped 3D images                                                                                      | 10.1002/mp.13466                                                                                                                                                                                              | Study design not suitable |
| Flores-Rodriguez & Cabanillas-Carbonell | 2022 | Implementation of a Mobile Application based on the Convolutional Neural Network for the Diagnosis of Pneumonia                                                                            | <a href="https://thesai.org/Publications/ViewPaper?Volume=13&amp;Issue=8&amp;Code=IJACSA&amp;SerialNo=53">https://thesai.org/Publications/ViewPaper?Volume=13&amp;Issue=8&amp;Code=IJACSA&amp;SerialNo=53</a> | Study design not suitable |
| Freer & Ullissey                        | 2001 | Screening mammography with computer-aided detection: prospective study of 12,860 patients in a community breast center                                                                     | 10.1148/radiol.2203001282                                                                                                                                                                                     | Unable to retrieve        |
| Gooding et al.                          | 2018 | Comparative evaluation of autocontouring in clinical practice: A practical method using the Turing test                                                                                    | 10.1002/mp.13200                                                                                                                                                                                              | Study design not suitable |
| Guermazi et al.                         | 2022 | Improving Radiographic Fracture Recognition Performance and Efficiency Using Artificial Intelligence                                                                                       | 10.1148/radiol.210937                                                                                                                                                                                         | Study design not suitable |
| Gulshan et al.                          | 2019 | Performance of a Deep-Learning Algorithm vs Manual Grading for Detecting Diabetic Retinopathy in India                                                                                     | 10.1001/jamaophthalmol.2019.2004                                                                                                                                                                              | No outcomes of interest   |
| Herweh et al.                           | 2016 | Performance of e-ASPECTS software in comparison to that of stroke physicians on assessing CT scans of acute ischemic stroke patients                                                       | 10.1177/1747493016632244                                                                                                                                                                                      | Study design not suitable |
| Heydon et al.                           | 2021 | Prospective evaluation of an artificial intelligence-enabled algorithm for automated diabetic retinopathy screening of 30 000 patients                                                     | 10.1136/bjophthalmol-2020-316594                                                                                                                                                                              | No outcomes of interest   |

|                        |      |                                                                                                                                                                                                                   |                              |                           |
|------------------------|------|-------------------------------------------------------------------------------------------------------------------------------------------------------------------------------------------------------------------|------------------------------|---------------------------|
| Hong et al.            | 2022 | Implementation of machine learning in the clinic: challenges and lessons in prospective deployment from the System for High Intensity Evaluation During Radiation Therapy (SHIELD-RT) randomized controlled study | 10.1186/s12859-022-04940-3   | Intervention not suitable |
| Howard et al.          | 2023 | Automated Inline Myocardial Segmentation of Joint T1 and T2 Mapping Using Deep Learning                                                                                                                           | 10.1148/ryai.220050          | Study design not suitable |
| Hwang et al.           | 2020 | Implementation of a Deep Learning-Based Computer-Aided Detection System for the Interpretation of Chest Radiographs in Patients Suspected for COVID-19                                                            | 10.3348/kjr.2020.0536        | Intervention not suitable |
| Johnny & Madhusoodanan | 2021 | Edge Computing Using Embedded Webserver with Mobile Device for Diagnosis and Prediction of Metastasis in Histopathological Images                                                                                 | 10.1007/s44196-021-00040-x   | Intervention not suitable |
| Jung et al.            | 2014 | Who could benefit the most from using a computer-aided detection system in full-field digital mammography?                                                                                                        | 10.1186/1477-7819-12-168     | Study design not suitable |
| Kau et al.             | 2022 | FDA-approved deep learning software application versus radiologists with different levels of expertise: detection of intracranial hemorrhage in a retrospective single-center study                               | 10.1007/s00234-021-02874-w   | No outcomes of interest   |
| Kiser et al.           | 2020 | Novel Autosegmentation Spatial Similarity Metrics Capture the Time Required to Correct Segmentations Better than Traditional Metrics in a Thoracic Cavity Segmentation Workflow                                   | 10.1101/2020.05.14.20102103  | Study design not suitable |
| Krenzer et al.         | 2022 | Fast machine learning annotation in the medical domain: a semi-automated video annotation tool for gastroenterologists                                                                                            | 10.1186/s12938-022-01001-x   | Intervention not suitable |
| Kural et al.           | 2022 | Accurate identification of EEG recordings with interictal epileptiform discharges using a hybrid approach: Artificial intelligence supervised by human experts                                                    | 10.1111/epi.17206            | Intervention not suitable |
| Ladefoged et al.       | 2019 | Deep Learning Based Attenuation Correction of PET/MRI in Pediatric Brain Tumor Patients: Evaluation in a Clinical Setting                                                                                         | 10.3389/fnins.2018.01005     | No outcomes of interest   |
| Lee et al.             | 2017 | Fully Automated Deep Learning System for Bone Age Assessment                                                                                                                                                      | 10.1007/s10278-017-9955-8    | Study design not suitable |
| Lehman et al.          | 2019 | Mammographic Breast Density Assessment Using Deep Learning: Clinical Implementation                                                                                                                               | 10.1148/radiol.2018180694    | No outcomes of interest   |
| Li et al.              | 2022 | Impact of continuous learning on diagnostic breast MRI AI: evaluation on an independent clinical dataset                                                                                                          | 10.1117/1.JMI.9.3.034502     | Study design not suitable |
| Liu et al.             | 2022 | The challenges facing deep learning-based catheter localization for ultrasound guided high-dose-rate prostate brachytherapy                                                                                       | 10.1002/mp.15522             | Study design not suitable |
| Lotan et al.           | 2022 | Development and Practical Implementation of a Deep Learning-Based Pipeline for Automated Pre- and Postoperative Glioma Segmentation                                                                               | 10.3174/ajnr.A7363           | Study design not suitable |
| Lu S-L et al.          | 2021 | Randomized multi-reader evaluation of automated detection and segmentation of brain tumors in stereotactic radiosurgery with deep neural networks                                                                 | 10.1093/neuonc/noab071       | Study design not suitable |
| Lu Y & Zhang           | 2019 | Deep neural networks assisted diagnosis for metastatic pelvic lymph nodes                                                                                                                                         | 10.1097/DCR.0000000000001415 | Study design not suitable |
| Lucido et al.          | 2023 | Validation of clinical acceptability of deep-learning-based automated segmentation of organs-at-risk for head-and-neck radiotherapy treatment planning                                                            | 10.3389/fonc.2023.1137803    | Study design not suitable |
| Lustberg et al.        | 2018 | Clinical evaluation of atlas and deep learning based automatic contouring for lung cancer                                                                                                                         | 10.1016/j.radonc.2017.11.012 | Study design not suitable |
| Mathew et al.          | 1989 | Artificial intelligence in the prediction of operative findings in low back surgery                                                                                                                               | 10.3109/02688698909002791    | Published before 2000     |

|                       |      |                                                                                                                                                                                                                              |                                 |                               |
|-----------------------|------|------------------------------------------------------------------------------------------------------------------------------------------------------------------------------------------------------------------------------|---------------------------------|-------------------------------|
| Matsoukas et al.      | 2023 | AI software detection of large vessel occlusion stroke on CT angiography: a real-world prospective diagnostic test accuracy study                                                                                            | 10.1136/neurintsurg-2021-018391 | No outcomes of interest       |
| Matsumoto et al.      | 2013 | Computer-aided detection of lung nodules on multidetector CT in concurrent-reader and second-reader modes: a comparative study                                                                                               | 10.1016/j.ejrad.2013.02.005     | Study design not suitable     |
| McClatchey et al.     | 2013 | Intelligent grid enabled services for neuroimaging analysis                                                                                                                                                                  | 10.1016/j.neucom.2013.01.042    | Study design not suitable     |
| Medela et al.         | 2022 | Automatic SCORing of Atopic Dermatitis Using Deep Learning: A Pilot Study                                                                                                                                                    | 10.1016/j.xjidi.2022.100107     | Study design not suitable     |
| Ming et al.           | 2021 | Evaluation of a novel artificial intelligence-based screening system for diabetic retinopathy in community of China: a real-world study                                                                                      | 10.1007/s10792-020-01685-x      | No outcomes of interest       |
| Miyake et al.         | 2013 | Comparative performance of a primary-reader and second-reader paradigm of computer-aided detection for CT colonography in a low-prevalence screening population                                                              | 10.1007/s11604-013-0187-7       | Study design not suitable     |
| Morgado et al.        | 2021 | Incremental Learning for Dermatological Imaging Modality Classification                                                                                                                                                      | 10.3390/jimaging7090180         | Intervention not suitable     |
| Morozov et al.        | 2022 | Effect of artificial intelligence technologies on the CT scan interpreting time in COVID-19 patients in inpatient setting                                                                                                    | 10.17116/profmed20222501114     | Non-eligible publication type |
| Morris et al.         | 2019 | Cardiac substructure segmentation with deep learning for improved cardiac sparing                                                                                                                                            | 10.1002/mp.13940                | Study design not suitable     |
| Mozaffary et al.      | 2019 | Integration of fully automated computer-aided pulmonary nodule detection into CT pulmonary angiography studies in the emergency department: effect on workflow and diagnostic accuracy                                       | 10.1007/s10140-019-01707-x      | Study design not suitable     |
| Nguyen et al.         | 2022 | Deployment and validation of an AI system for detecting abnormal chest radiographs in clinical settings                                                                                                                      | 10.3389/fdgth.2022.890759       | No outcomes of interest       |
| Ni et al.             | 2020 | A deep learning approach to characterize 2019 coronavirus disease (COVID-19) pneumonia in chest CT images                                                                                                                    | 10.1007/s00330-020-07044-9      | Study design not suitable     |
| Ong et al.            | 2021 | Integration of a vertebral fracture identification service into a fracture liaison service: a quality improvement project                                                                                                    | 10.1007/s00198-020-05710-8      | Intervention not suitable     |
| Oscanoa et al.        | 2023 | Accelerated two-dimensional phase-contrast for cardiovascular MRI using deep learning-based reconstruction with complex difference estimation                                                                                | 10.1002/mrm.29441 EA SEP 2022   | No outcomes of interest       |
| Otaki et al.          | 2022 | Clinical Deployment of Explainable Artificial Intelligence of SPECT for Diagnosis of Coronary Artery Disease                                                                                                                 | 10.1016/j.jcmg.2021.04.030      | Study design not suitable     |
| Park et al.           | 2023 | Identification of Active Pulmonary Tuberculosis Among Patients With Positive Interferon-Gamma Release Assay Results: Value of a Deep Learning-based Computer-aided Detection System in Different Scenarios of Implementation | 10.1097/RTI.0000000000000691    | Unable to retrieve            |
| Quon et al.           | 2020 | Deep Learning for Automated Delineation of Pediatric Cerebral Arteries on Pre-operative Brain Magnetic Resonance Imaging                                                                                                     | 10.3389/fsurg.2020.517375       | Study design not suitable     |
| Rodrigues et al.      | 2022 | Automated Large Artery Occlusion Detection in Stroke: A Single-Center Validation Study of an Artificial Intelligence Algorithm                                                                                               | 10.1159/000519125               | Study design not suitable     |
| Rodríguez-Ruiz et al. | 2019 | Detection of Breast Cancer with Mammography: Effect of an Artificial Intelligence Support System                                                                                                                             | 10.1148/radiol.2018181371       | Study design not suitable     |
| Ronmark et al.        | 2022 | Effect of digital-enabled multidisciplinary therapy conferences on efficiency and quality of the decision making in prostate cancer care                                                                                     | 10.1136/bmjhci-2022-100588      | Intervention not suitable     |
| Roser et al.          | 2021 | Evaluation of the implementation of an approved artificial intelligence system for the detection of diabetic retinopathy                                                                                                     | 10.1055/a-1521-7645             | No outcomes of interest       |

|                   |      |                                                                                                                                                                                                                                                      |                                    |                           |
|-------------------|------|------------------------------------------------------------------------------------------------------------------------------------------------------------------------------------------------------------------------------------------------------|------------------------------------|---------------------------|
| Rueckel et al.    | 2021 | Artificial intelligence assistance improves reporting efficiency of thoracic aortic aneurysm CT follow-up                                                                                                                                            | 10.1016/j.ejrad.2020.109424        | Study design not suitable |
| Salwei et al.     | 2022 | Usability of a Human Factors-based Clinical Decision Support in the Emergency Department: Lessons Learned for Design and Implementation                                                                                                              | 10.1177/00187208221078625          | Intervention not suitable |
| Savenije et al.   | 2020 | Clinical implementation of MRI-based organs-at-risk auto-segmentation with convolutional networks for prostate radiotherapy                                                                                                                          | 10.1186/s13014-020-01528-0         | No outcomes of interest   |
| Schlaeger et al.  | 2023 | Implementation of GAN-Based, Synthetic T2-Weighted Fat Saturated Images in the Routine Radiological Workflow Improves Spinal Pathology Detection                                                                                                     | 10.3390/diagnostics13050974        | Intervention not suitable |
| Shaaer et al.     | 2022 | Deep-learning-assisted algorithm for catheter reconstruction during MR-only gynecological interstitial brachytherapy                                                                                                                                 | 10.1002/acm2.13494                 | Study design not suitable |
| Si et al.         | 2021 | Fully end-to-end deep-learning-based diagnosis of pancreatic tumors                                                                                                                                                                                  | 10.7150/thno.52508                 | Study design not suitable |
| Silva L et al.    | 2021 | Independent real-world application of a clinical-grade automated prostate cancer detection system                                                                                                                                                    | 10.1002/path.5662                  | Study design not suitable |
| Sollini et al.    | 2023 | The Development of an Intelligent Agent to Detect and Non-Invasively Characterize Lung Lesions on CT Scans: Ready for the “Real World”?                                                                                                              | 10.3390/cancers15020357            | Study design not suitable |
| Song et al.       | 2023 | Comparative validation of AI and non-AI methods in MRI volumetry to diagnose Parkinsonian syndromes                                                                                                                                                  | 10.1038/s41598-023-30381-w         | Study design not suitable |
| Steiner et al.    | 2020 | Evaluation of the Use of Combined Artificial Intelligence and Pathologist Assessment to Review and Grade Prostate Biopsies                                                                                                                           | 10.1001/jamanetworkopen.2020.23267 | Study design not suitable |
| Sung et al.       | 2021 | Added Value of Deep Learning–based Detection System for Multiple Major Findings on Chest Radiographs: A Randomized Crossover Study                                                                                                                   | 10.1148/radiol.2021202818          | Study design not suitable |
| Tam et al.        | 2021 | Augmenting lung cancer diagnosis on chest radiographs: positioning artificial intelligence to improve radiologist performance                                                                                                                        | 10.1016/j.crad.2021.03.021         | Study design not suitable |
| Thainimit et al.  | 2022 | Robotic process automation support in telemedicine: Glaucoma screening usage case                                                                                                                                                                    | 10.1016/j.imu.2022.101001          | Intervention not suitable |
| Thakur et al.     | 2022 | Clinically Deployed Computational Assessment of Multiple Sclerosis Lesions                                                                                                                                                                           | 10.3389/fmed.2022.797586           | No outcomes of interest   |
| Tian et al.       | 2022 | Endoscopists' Acceptance on the Implementation of Artificial Intelligence in Gastrointestinal Endoscopy: Development and Case Analysis of a Scale                                                                                                    | 10.3389/fmed.2022.760634           | Study design not suitable |
| Titano et al.     | 2018 | Automated deep-neural-network surveillance of cranial images for acute neurologic events                                                                                                                                                             | 10.1038/s41591-018-0147-y          | Study design not suitable |
| Urago et al.      | 2021 | Evaluation of auto-segmentation accuracy of cloud-based artificial intelligence and atlas-based models                                                                                                                                               | 10.1186/s13014-021-01896-1         | Study design not suitable |
| Walker et al.     | 2014 | Prospective randomized double-blind study of atlas-based organ-at-risk autosegmentation-assisted radiation planning in head and neck cancer                                                                                                          | 10.1016/j.radonc.2014.08.028       | Study design not suitable |
| Wallace et al.    | 2022 | Impact of Artificial Intelligence on Miss Rate of Colorectal Neoplasia                                                                                                                                                                               | 10.1053/j.gastro.2022.03.007       | No outcomes of interest   |
| White et al.      | 2022 | Pre-deployment assessment of an AI model to assist radiologists in chest X-ray detection and identification of lead-less implanted electronic devices for pre-MRI safety screening: realized implementation needs and proposed operational solutions | 10.1117/1.JMI.9.5.054504           | Intervention not suitable |
| Wittenberg et al. | 2013 | Computed tomography pulmonary angiography in acute pulmonary embolism: the effect of a computer-assisted detection prototype used as a concurrent reader                                                                                             | 10.1097/RTI.0b013e3182870b97       | Unable to retrieve        |

|                  |      |                                                                                                                                                      |                            |                           |
|------------------|------|------------------------------------------------------------------------------------------------------------------------------------------------------|----------------------------|---------------------------|
| Xue et al.       | 2022 | A multi-feature deep learning system to enhance glaucoma severity diagnosis with high accuracy and fast speed                                        | 10.1016/j.jbi.2022.104233  | Study design not suitable |
| Yi et al.        | 2021 | DICOM Image ANalysis and Archive (DIANA): an Open-Source System for Clinical AI Applications                                                         | 10.1007/s10278-021-00488-5 | Intervention not suitable |
| Yoo et al.       | 2023 | Healthcare Professionals' Expectations of Medical Artificial Intelligence and Strategies for its Clinical Implementation: A Qualitative Study        | 10.4258/hir.2023.29.1.64   | Intervention not suitable |
| Zabel et al.     | 2021 | Clinical Evaluation of Deep Learning and Atlas-Based Auto-Contouring of Bladder and Rectum for Prostate Radiation Therapy                            | 10.1016/j.prro.2020.05.013 | Study design not suitable |
| Zhang et al.     | 2020 | Artificial intelligence-enabled screening for diabetic retinopathy: a real-world, multicenter and prospective study                                  | 10.1136/bmjdr-2020-001596  | No outcomes of interest   |
| Zippelius et al. | 2022 | Diagnostic accuracy of a novel artificial intelligence system for adenoma detection in daily practice: a prospective nonrandomized comparative study | 10.1055/a-1556-5984        | Study design not suitable |

# SUPPLEMENTARY FIGURE 1: RISK OF BIAS IN NON-RANDOMIZED STUDIES (ROBINS-I)

Individual assessments of the included non-randomized studies with the Risk of Bias in Non-randomized Studies of Interventions tool (ROBINS-I).

|                             | Risk of bias domains |    |    |    |    |    |    | Overall |
|-----------------------------|----------------------|----|----|----|----|----|----|---------|
|                             | D1                   | D2 | D3 | D4 | D5 | D6 | D7 |         |
| Arbabshirani et al. (2018)  | +                    | ×  | +  | +  | +  | +  | +  | ×       |
| Batra et al. (2023)         | +                    | +  | +  | +  | -  | +  | +  | -       |
| Carlile et al. (2020)       | -                    | +  | +  | +  | ×  | -  | +  | ×       |
| Cha et al. (2021)           | +                    | -  | ?  | ?  | -  | ×  | +  | ×       |
| Cheikh et al. (2022)        | -                    | +  | -  | ?  | ×  | ×  | +  | ×       |
| Chen et al. (2022)          | ×                    | -  | +  | +  | -  | ×  | +  | ×       |
| Conant et al. (2019)        | ×                    | +  | +  | -  | +  | ×  | +  | ×       |
| Davis et al. (2022)         | +                    | ×  | +  | +  | +  | ×  | +  | ×       |
| Diao et al. (2022)          | +                    | +  | ?  | +  | ?  | +  | +  | +       |
| Duron et al. (2021)         | ×                    | -  | +  | +  | +  | +  | +  | ×       |
| Elijovich et al. (2022)     | -                    | +  | -  | -  | +  | -  | +  | -       |
| Ginat (2021)                | -                    | +  | ?  | ?  | +  | +  | +  | +       |
| Hassan et al. (2022)        | +                    | +  | +  | +  | +  | ?  | -  | +       |
| Hong et al. (202)           | -                    | -  | +  | +  | ?  | +  | ×  | ×       |
| Jones et al. (2021)         | ×                    | +  | +  | +  | +  | -  | +  | ×       |
| Kanagasingam et al. (2018)  | -                    | ×  | +  | +  | -  | -  | -  | ×       |
| Kiljunen et al. (2020)      | ×                    | +  | +  | ×  | -  | +  | -  | +       |
| Ladabaum et al. (2023)      | -                    | -  | -  | -  | +  | ×  | -  | ×       |
| Levy et al. (2022)          | ×                    | +  | -  | ?  | -  | -  | +  | ×       |
| Liu et al. (2022)           | -                    | +  | +  | +  | -  | -  | -  | +       |
| Marwaha et al. (2021)       | -                    | -  | +  | +  | ×  | -  | +  | ×       |
| Mueller et al. (2022)       | ×                    | -  | +  | +  | +  | -  | +  | ×       |
| Nehme et al. (2023)         | -                    | -  | +  | -  | -  | ×  | +  | ×       |
| O'Neill et al. (2021)       | -                    | +  | +  | -  | +  | +  | +  | +       |
| Oppenheimer et al. (2023)   | -                    | ×  | +  | ?  | +  | ?  | +  | ×       |
| Pierce et al. (2021)        | -                    | ?  | +  | +  | ?  | ?  | ×  | ×       |
| Potrezke et al. (2023)      | -                    | +  | +  | ?  | ?  | -  | +  | +       |
| Quan et al. (2022)          | ×                    | -  | +  | +  | +  | -  | +  | ×       |
| Raya-Povedano et al. (2021) | ×                    | ×  | +  | +  | +  | -  | ×  | ×       |
| Ruamviboonsuk et al. (2022) | +                    | -  | -  | ?  | -  | -  | +  | -       |
| Sandbank et al. (2022)      | -                    | -  | +  | ?  | ?  | ×  | ×  | ×       |
| Schmuelling et al. (2021)   | +                    | ×  | +  | +  | ?  | +  | +  | ×       |
| Seyam et al. (2022)         | -                    | -  | +  | +  | ?  | +  | -  | -       |
| Sim et al. (2022)           | ×                    | +  | +  | -  | ?  | +  | +  | +       |
| Strolin et al. (2023)       | -                    | ×  | +  | ?  | ?  | -  | -  | ×       |
| Sun et al. (2022)           | -                    | -  | -  | ?  | ?  | +  | ×  | ×       |
| Tchou et al. (2010)         | ×                    | -  | +  | -  | +  | +  | +  | ×       |
| Tricario et al. (2022)      | +                    | ×  | +  | ?  | ?  | ?  | ?  | +       |
| Vassallo et al. (2019)      | ×                    | ×  | +  | +  | +  | -  | +  | ×       |
| Wang et al. (2020)          | -                    | +  | +  | +  | +  | ×  | +  | +       |
| Wittenberg et al. (2012)    | ×                    | -  | +  | +  | +  | ×  | -  | ×       |
| Wong et al. (2021)          | +                    | +  | +  | -  | ×  | ×  | +  | +       |
| Wong et al. (2023)          | -                    | ×  | +  | ?  | +  | -  | +  | +       |
| Yang et al. (2022)          | +                    | +  | ×  | ?  | +  | +  | -  | +       |
| Zia et al. (2022)           | +                    | -  | +  | ×  | -  | -  | +  | ×       |

Domains:

- D1: Bias due to confounding.
- D2: Bias due to selection of participants.
- D3: Bias in classification of interventions.
- D4: Bias due to deviations from intended interventions.
- D5: Bias due to missing data.
- D6: Bias in measurement of outcomes.
- D7: Bias in selection of the reported result.

Judgement

- Critical
- Serious
- Moderate
- Low
- No information

## SUPPLEMENTARY FIGURE 2: RISK OF BIAS IN RANDOMIZED STUDIES (ROB-2)

Individual assessments of the included randomized studies with the Cochrane Risk of Bias tool (ROB-2).

|                      | Risk of bias domains                                                              |                                                                                   |                                                                                   |                                                                                    |                                                                                     | Overall                                                                             |
|----------------------|-----------------------------------------------------------------------------------|-----------------------------------------------------------------------------------|-----------------------------------------------------------------------------------|------------------------------------------------------------------------------------|-------------------------------------------------------------------------------------|-------------------------------------------------------------------------------------|
|                      | D1                                                                                | D2                                                                                | D3                                                                                | D4                                                                                 | D5                                                                                  |                                                                                     |
| Study                |                                                                                   |                                                                                   |                                                                                   |                                                                                    |                                                                                     |                                                                                     |
| Repici et al. (2020) |  |  |  |  |  |  |
| Wang et al. (2019)   |  |  |  |  |  |  |
| Yacoub et al. (2022) |  |  |  |  |  |  |

Domains:

D1: Bias arising from the randomization process.

D2: Bias due to deviations from intended intervention.

D3: Bias due to missing outcome data.

D4: Bias in measurement of the outcome.

D5: Bias in selection of the reported result.

Judgement

 High

 Some concerns

 Low



### SUPPLEMENTARY FIGURE 3: MINORS FOR COMPARATIVE STUDIES

Individual assessments of the included comparative studies with the Methodological Index for Non-randomized Studies (MINORS).

|                             | Methodological items for non-randomized studies |                                   |                                |                                               |                                           |                                                      |                                 |                                       | Additional criteria for comparative studies |                     |                                |                               | Overall (max score 24) |
|-----------------------------|-------------------------------------------------|-----------------------------------|--------------------------------|-----------------------------------------------|-------------------------------------------|------------------------------------------------------|---------------------------------|---------------------------------------|---------------------------------------------|---------------------|--------------------------------|-------------------------------|------------------------|
|                             | Clearly stated aim                              | Inclusion of consecutive patients | Prospective collection of data | Endpoints appropriate to the aim of the study | Unbiased assessment of the study endpoint | Follow-up period appropriate to the aim of the study | Loss to follow up less than 5 % | Prospective calculation of study size | Adequate control group                      | Contemporary groups | Baseline equivalence of groups | Adequate statistical analysis |                        |
| Arbabshirani et al. (2018)  | 2                                               | 2                                 | 2                              | 1                                             | 2                                         | 2                                                    | 0                               | 0                                     | 0                                           | 2                   | 0                              | 2                             | 15                     |
| Batra et al. (2023)         | 2                                               | 1                                 | 0                              | 2                                             | 2                                         | 2                                                    | 0                               | 0                                     | 2                                           | 1                   | 2                              | 2                             | 16                     |
| Cha et al. (2021)           | 2                                               | 2                                 | 2                              | 2                                             | 0                                         | 1                                                    | 1                               | 0                                     | 1                                           | 0                   | 0                              | 2                             | 13                     |
| Cheikh et al. (2022)        | 2                                               | 2                                 | 0                              | 2                                             | 0                                         | 2                                                    | 1                               | 0                                     | 2                                           | 0                   | 1                              | 2                             | 14                     |
| Chen et al. (2022)          | 1                                               | 1                                 | 1                              | 2                                             | 1                                         | 0                                                    | 1                               | 0                                     | 2                                           | 0                   | 2                              | 2                             | 13                     |
| Conant et al. (2019)        | 2                                               | 0                                 | 1                              | 2                                             | 1                                         | 1                                                    | 2                               | 1                                     | 1                                           | 2                   | 2                              | 2                             | 17                     |
| Davis et al. (2022)         | 2                                               | 2                                 | 1                              | 2                                             | 0                                         | 2                                                    | 2                               | 0                                     | 2                                           | 0                   | 1                              | 1                             | 15                     |
| Diao et al. (2022)          | 2                                               | 2                                 | 1                              | 2                                             | 2                                         | 2                                                    | 2                               | 0                                     | 1                                           | 2                   | 0                              | 2                             | 18                     |
| Duron et al. (2021)         | 2                                               | 0                                 | 1                              | 2                                             | 2                                         | 2                                                    | 2                               | 0                                     | 2                                           | 2                   | 2                              | 2                             | 19                     |
| Elijovic et al. (2022)      | 1                                               | 2                                 | 0                              | 2                                             | 2                                         | 2                                                    | 2                               | 0                                     | 1                                           | 0                   | 1                              | 2                             | 15                     |
| Ginat (2021)                | 2                                               | 1                                 | 0                              | 2                                             | 1                                         | 2                                                    | 2                               | 0                                     | 0                                           | 0                   | 0                              | 1                             | 11                     |
| Hassan et al. (2021)        | 2                                               | 2                                 | 0                              | 2                                             | 1                                         | 2                                                    | 2                               | 0                                     | 2                                           | 0                   | 2                              | 2                             | 17                     |
| Hong et al. (2022)          | 2                                               | 2                                 | 0                              | 1                                             | 2                                         | 1                                                    | 2                               | 1                                     | 1                                           | 0                   | 1                              | 2                             | 15                     |
| Kiljunen et al. (2020)      | 2                                               | 0                                 | 0                              | 2                                             | 0                                         | 0                                                    | 2                               | 0                                     | 1                                           | 0                   | 2                              | 0                             | 9                      |
| Ladabaum et al. (2023)      | 2                                               | 1                                 | 0                              | 2                                             | 1                                         | 2                                                    | 2                               | 0                                     | 2                                           | 1                   | 2                              | 1                             | 16                     |
| Levy et al. (2022)          | 1                                               | 2                                 | 0                              | 2                                             | 1                                         | 2                                                    | 1                               | 0                                     | 2                                           | 0                   | 2                              | 1                             | 14                     |
| Lin et al. (2019)           | 2                                               | 0                                 | 0                              | 2                                             | 0                                         | 2                                                    | 2                               | 0                                     | 2                                           | 0                   | 2                              | 2                             | 14                     |
| Liu et al. (2020)           | 2                                               | 0                                 | 1                              | 1                                             | 1                                         | 2                                                    | 2                               | 0                                     | 1                                           | 1                   | 1                              | 1                             | 13                     |
| Marwaha et al. (2021)       | 2                                               | 1                                 | 0                              | 1                                             | 0                                         | 2                                                    | 0                               | 0                                     | 1                                           | 1                   | 1                              | 0                             | 9                      |
| Mueller et al. (2022)       | 2                                               | 2                                 | 2                              | 2                                             | 1                                         | 1                                                    | 2                               | 2                                     | 1                                           | 2                   | 1                              | 2                             | 20                     |
| Nehme et al. (2023)         | 2                                               | 1                                 | 1                              | 2                                             | 1                                         | 2                                                    | 1                               | 0                                     | 2                                           | 0                   | 2                              | 2                             | 16                     |
| O'Neill et al. (2021)       | 2                                               | 2                                 | 1                              | 2                                             | 2                                         | 2                                                    | 2                               | 0                                     | 1                                           | 0                   | 1                              | 2                             | 17                     |
| Quan et al. (2022)          | 2                                               | 2                                 | 1                              | 2                                             | 1                                         | 2                                                    | 2                               | 0                                     | 2                                           | 0                   | 1                              | 2                             | 17                     |
| Raya-Povedano et al. (2021) | 2                                               | 2                                 | 0                              | 1                                             | 0                                         | 2                                                    | 2                               | 0                                     | 1                                           | 0                   | 1                              | 1                             | 12                     |
| Repici et al. (2020)        | 1                                               | 1                                 | 2                              | 2                                             | 1                                         | 2                                                    | 2                               | 2                                     | 2                                           | 2                   | 2                              | 2                             | 21                     |
| Schmuelling et al. (2021)   | 2                                               | 1                                 | 0                              | 2                                             | 2                                         | 2                                                    | 2                               | 0                                     | 2                                           | 0                   | 1                              | 2                             | 16                     |
| Seyam et al. (2022)         | 2                                               | 2                                 | 1                              | 2                                             | 2                                         | 2                                                    | 2                               | 0                                     | 2                                           | 1                   | 1                              | 0                             | 17                     |
| Sim et al. (2022)           | 2                                               | 0                                 | 1                              | 2                                             | 2                                         | 0                                                    | 2                               | 0                                     | 1                                           | 1                   | 0                              | 1                             | 12                     |
| Strolin et al. (2023)       | 1                                               | 0                                 | 1                              | 2                                             | 1                                         | 2                                                    | 2                               | 0                                     | 2                                           | 0                   | 2                              | 1                             | 14                     |
| Tchou et al. (2010)         | 2                                               | 0                                 | 1                              | 2                                             | 2                                         | 2                                                    | 1                               | 0                                     | 0                                           | 0                   | 0                              | 2                             | 12                     |
| Tricario et al. (2022)      | 2                                               | 0                                 | 0                              | 2                                             | 1                                         | 0                                                    | 0                               | 0                                     | 0                                           | 1                   | 2                              | 1                             | 9                      |
| Vassallo et al. (2019)      | 2                                               | 2                                 | 0                              | 2                                             | 1                                         | 0                                                    | 2                               | 0                                     | 0                                           | 2                   | 2                              | 2                             | 15                     |
| Wang et al. (2019)          | 2                                               | 2                                 | 2                              | 2                                             | 1                                         | 2                                                    | 2                               | 2                                     | 2                                           | 2                   | 2                              | 2                             | 23                     |
| Wang et al. (2020)          | 1                                               | 2                                 | 1                              | 2                                             | 0                                         | 1                                                    | 2                               | 2                                     | 1                                           | 1                   | 2                              | 2                             | 17                     |
| Yacoub et al. (2022)        | 2                                               | 2                                 | 2                              | 2                                             | 1                                         | 2                                                    | 0                               | 2                                     | 2                                           | 2                   | 2                              | 2                             | 21                     |
| Yang et al. (2022)          | 2                                               | 2                                 | 1                              | 2                                             | 0                                         | 2                                                    | 2                               | 1                                     | 1                                           | 1                   | 0                              | 1                             | 15                     |
| Zia et al. (2022)           | 2                                               | 2                                 | 1                              | 2                                             | 1                                         | 2                                                    | 2                               | 0                                     | 2                                           | 2                   | 0                              | 0                             | 16                     |

Notes: Green = 2 (reported and adequate), yellow = 1 (reported but inadequate) and red = 0 (not reported)

#### SUPPLEMENTARY FIGURE 4: MINORS FOR NON-COMPARATIVE STUDIES

Individual assessments of the included non-comparative studies with the Methodological Index for Non-randomized Studies (MINORS).

|                             | Clearly stated aim | Inclusion of consecutive patients | Prospective collection of data | Endpoints appropriate to the aim of the study | Unbiased assessment of the study endpoint | Follow-up period appropriate to the aim of the study | Loss to follow up less than 5 % | Prospective calculation of study size | Overall (max score: 16) |
|-----------------------------|--------------------|-----------------------------------|--------------------------------|-----------------------------------------------|-------------------------------------------|------------------------------------------------------|---------------------------------|---------------------------------------|-------------------------|
| Carlile et al. (2020)       | 1                  | 1                                 | 2                              | 1                                             | 1                                         | 2                                                    | 0                               | 0                                     | 8                       |
| Jones et al. (2021)         | 2                  | 2                                 | 1                              | 2                                             | 1                                         | 1                                                    | 1                               | 0                                     | 10                      |
| Kanagasingam et al. (2018)  | 1                  | 1                                 | 2                              | 1                                             | 1                                         | 2                                                    | 1                               | 0                                     | 9                       |
| Oppenheimer et al. (2023)   | 2                  | 1                                 | 1                              | 2                                             | 1                                         | 2                                                    | 2                               | 2                                     | 13                      |
| Potretzke et al. (2023)     | 2                  | 0                                 | 1                              | 1                                             | 1                                         | 2                                                    | 2                               | 0                                     | 9                       |
| Ruamviboonsuk et al. (2022) | 2                  | 1                                 | 2                              | 2                                             | 1                                         | 2                                                    | 2                               | 2                                     | 14                      |
| Sandbank et al. (2022)      | 2                  | 2                                 | 1                              | 1                                             | 1                                         | 2                                                    | 2                               | 1                                     | 12                      |
| Sun et al. (2022)           | 2                  | 2                                 | 1                              | 2                                             | 2                                         | 2                                                    | 1                               | 2                                     | 14                      |
| Wittenberg et al. (2012)    | 1                  | 2                                 | 0                              | 1                                             | 0                                         | 2                                                    | 2                               | 0                                     | 8                       |
| Wong et al. (2021)          | 2                  | 0                                 | 1                              | 1                                             | 0                                         | 2                                                    | 0                               | 0                                     | 6                       |
| Wong et al. (2023)          | 2                  | 0                                 | 2                              | 2                                             | 1                                         | 1                                                    | 0                               | 0                                     | 8                       |

Notes: Green = 2 (reported and adequate), yellow = 1 (reported but inadequate) and red = 0 (not reported)

# SUPPLEMENTARY FIGURE 5: FUNNEL PLOT FOR META-ANALYSIS A

Visual investigation of the publication bias for the first meta-analysis on studies using AI for CT detection.

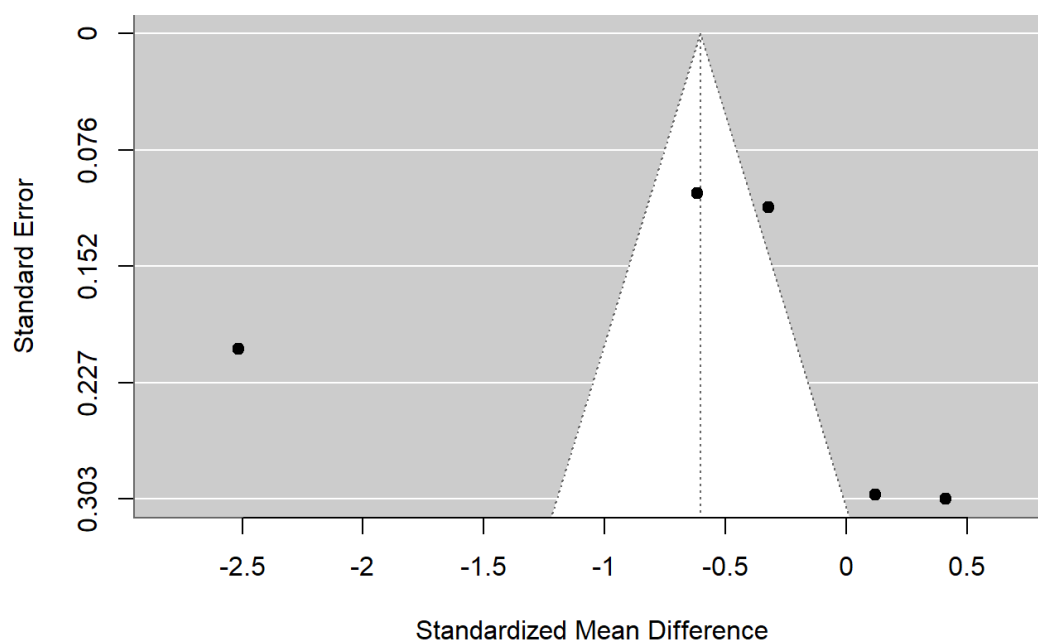

# SUPPLEMENTARY FIGURE 6: FUNNEL PLOT FOR META-ANALYSIS B

Visual investigation of the publication bias for the second meta-analysis on studies using AI for endoscopy.

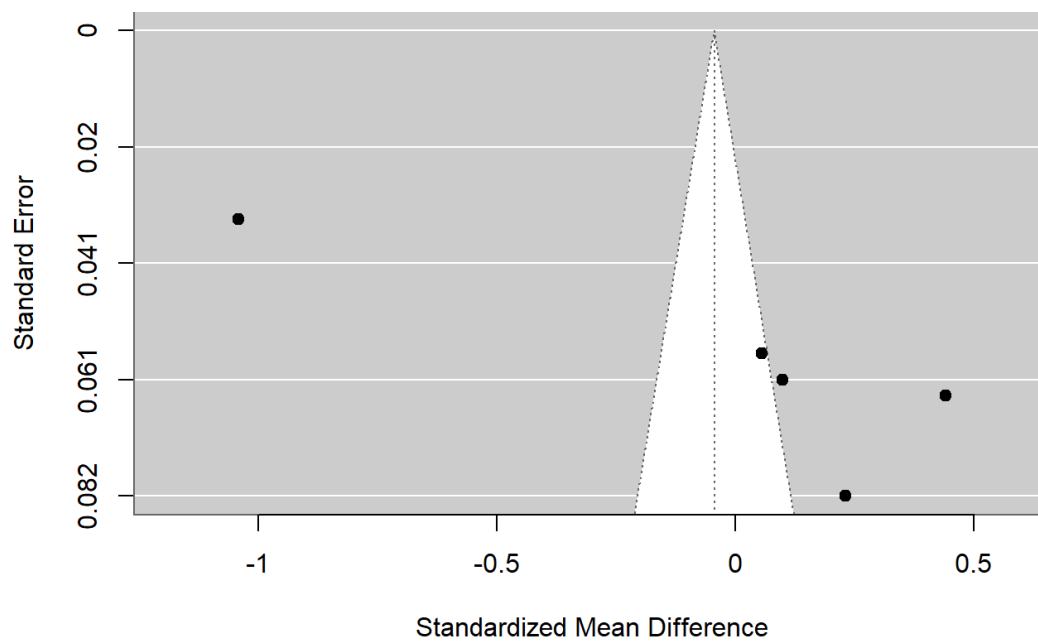

### SUPPLEMENTARY FIGURE 7: FUNNEL PLOT FOR META-ANALYSIS C

Visual investigation of the publication bias for the third meta-analysis on studies using AI for re-prioritization of patients.

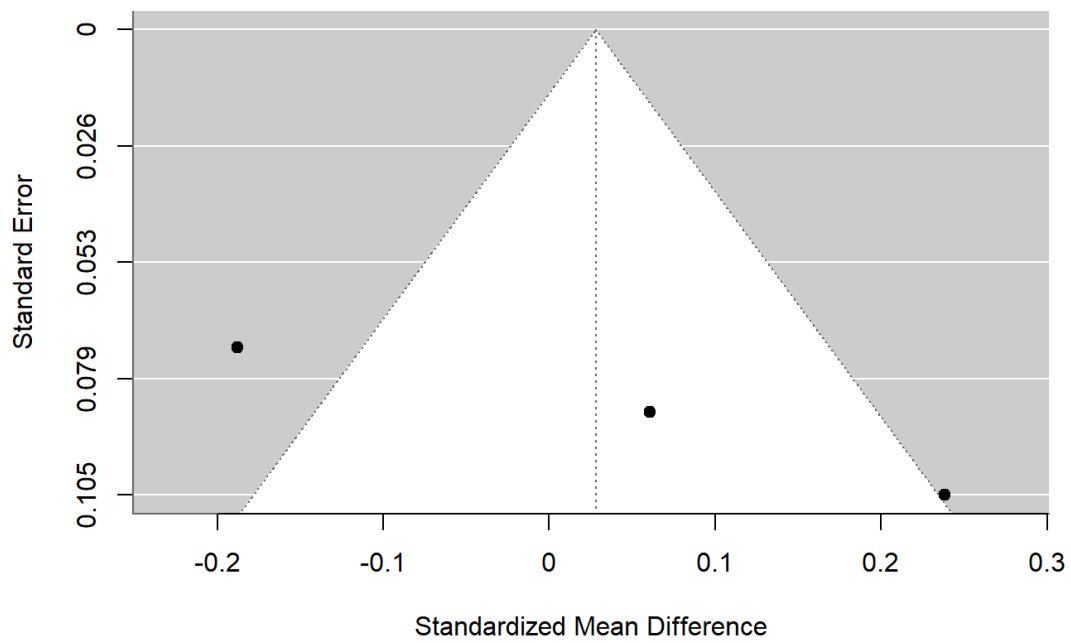

**SUPPLEMENTARY TABLE 2: CONFERENCE PAPERS EXCLUDED DURING FULL TEXT-SCREENING**

| AUTHOR(S)          | YEAR | TITLE                                                                                                                                                                                                   | DOI / URL                                                                                                                                                                                                                                                                                                                                     | CONFERENCE                                                          | PRESENTATION TYPE | AVAILABLE PUBLICATION |
|--------------------|------|---------------------------------------------------------------------------------------------------------------------------------------------------------------------------------------------------------|-----------------------------------------------------------------------------------------------------------------------------------------------------------------------------------------------------------------------------------------------------------------------------------------------------------------------------------------------|---------------------------------------------------------------------|-------------------|-----------------------|
| Aboian et al.      | 2022 | Development of a workflow efficient PACS based automated brain tumor segmentation and radiomic feature extraction for clinical implementation (N2.003)                                                  | 10.1212/WNL.98.18_supplement.3146                                                                                                                                                                                                                                                                                                             | American Academy of Neurology Annual meeting                        | Poster            | Abstract              |
| Ajmera et al.      | 2022 | Evaluating the effectivity of deploying a deep learning-based algorithm to aid clinicians and radiologists in diagnosing pulmonary nodules on chest radiographs                                         | 10.1183/13993003.congress-2022.4308                                                                                                                                                                                                                                                                                                           | European Respiratory Society International Congress                 | NI                | Abstract              |
| Almansour et al.   | 2022 | Prospective deployment of a novel deep learning MRI reconstruction for accelerated spine imaging: an analysis of interchangeability, image quality and diagnostic confidence                            | 10.1186/s13244-022-01337-x                                                                                                                                                                                                                                                                                                                    | European Congress of Radiology                                      | Oral              | Abstract              |
| Bangash et al.     | 2023 | Provider Feedback on Implementation of a Genomic Clinical Decision Support for Familial Hypercholesterolemia                                                                                            | 10.1016/j.jacl.2021.09.034                                                                                                                                                                                                                                                                                                                    | NI                                                                  | Poster            | Abstract              |
| Berhanu et al.     | 2022 | Clinical Application of Artificial Intelligence in Multiple Sclerosis: Does Automated Lesion Segmentation Help?                                                                                         | 10.1007/s00234-022-03012-w                                                                                                                                                                                                                                                                                                                    | Annual Meeting of the European Society of Neuroradiology            | Poster            | Abstract              |
| Chang et al.       | 2022 | Abstract WMP68: Artificial Intelligence For Automated Detection Of Large Vessel Occlusion Using Relative Vessel Density (RAPID LVO): One Year Experience In A Multihospital Integrated Delivery Network | 10.1161/str.53.suppl_1.WMP68                                                                                                                                                                                                                                                                                                                  | International Stroke Conference                                     | Poster            | Abstract              |
| Chen K et al.      | 2022 | Integration of Artificial Intelligence into a Telemedicine-Based Diabetic Retinopathy Screening Program                                                                                                 | <a href="https://iovs.arvojournals.org/article.aspx?articleid=2779657">https://iovs.arvojournals.org/article.aspx?articleid=2779657</a>                                                                                                                                                                                                       | Association for Research in Vision and Ophthalmology Annual Meeting | NI                | Abstract              |
| Coronel et al.     | 2022 | Physician And Staff Attitudes Towards Implementation Of Artificial Intelligence-Assisted Colonoscopy                                                                                                    | <a href="https://eposters.ddw.org/ddw/2022/ddw-2022/353713/phillip.ge.physician.and.staff.attitudes.towards.implementation.of.artificial.html">https://eposters.ddw.org/ddw/2022/ddw-2022/353713/phillip.ge.physician.and.staff.attitudes.towards.implementation.of.artificial.html</a>                                                       | Digestive Disease Week                                              | Poster            | Abstract & Poster     |
| Dao et al.         | 2020 | IDDF2020-ABS-0165 Accuracy and applicability of the artificial intelligence integrated software in Z-line segmentation                                                                                  | 10.1136/gutjnl-2020-IDDF.7                                                                                                                                                                                                                                                                                                                    | International Digestive Disease Forum (IDDF)                        | NI                | Abstract              |
| Elías Cabot et al. | 2022 | Evaluation of the performance of artificial intelligence (AI) after one year of use in breast cancer screening practice: is the promise being delivered?                                                | 10.1186/s13244-022-01337-x                                                                                                                                                                                                                                                                                                                    | European Congress of Radiology                                      | Oral              | Abstract              |
| Fiorina et al.     | 2020 | 222 AI-based strategy enables faster Holter ECG analysis with equivalent clinical accuracy compared to a classical strategy                                                                             | 10.1093/europace/euaa162.374                                                                                                                                                                                                                                                                                                                  | European Heart Rhythm Association Congress                          | NI                | Abstract              |
| Fraggetta et al.   | 2019 | Implementation of the ContextVision INIFY(TM) tool for the automatic detection of prostatic cancer in a fully digital routine workflow                                                                  | 10.1007/s00428-019-02631-8                                                                                                                                                                                                                                                                                                                    | European Congress of Pathology                                      | Oral              | Abstract              |
| Galoosian et al.   | 2022 | Tu1046: Implementation Of A Machine Learning Algorithm To Measure Adenoma Detection Rates In A Large Health System                                                                                      | <a href="https://eposters.ddw.org/ddw/2022/ddw-2022/355211/artin.galoosian.implementation.of.a.machine.learning.algorithm.to.measure.html?f=listing%3D3%2Abrowseby%3D8%2">https://eposters.ddw.org/ddw/2022/ddw-2022/355211/artin.galoosian.implementation.of.a.machine.learning.algorithm.to.measure.html?f=listing%3D3%2Abrowseby%3D8%2</a> | Digestive Disease Week                                              | Poster            | Abstract & Poster     |

|                    |      |                                                                                                                                                                                                   |                                                                           |                                                                          |        |          |
|--------------------|------|---------------------------------------------------------------------------------------------------------------------------------------------------------------------------------------------------|---------------------------------------------------------------------------|--------------------------------------------------------------------------|--------|----------|
|                    |      |                                                                                                                                                                                                   | Asortby%3D2%Amedia%3D3%Alabel%3D25127                                     |                                                                          |        |          |
| Goldstein et al.   | 2022 | 69-OR: Implementing Autonomous AI in a Federally Qualified Health Center (FQHC) for the Detection of Diabetic Retinopathy Improves Access to Care: A Pre-Post Comparison in the Southeastern U.S. | 10.2337/db22-69-OR                                                        | American Diabetes Association Scientific Sessions                        | Oral   | Abstract |
| Greenberg et al.   | 2022 | Image-based identification of HER2 status in H&E-stained breast cancer slides                                                                                                                     | 10.1007/s00428-022-03379-4                                                | European Congress of Pathology                                           | Oral   | Abstract |
| Guthier et al.     | 2022 | PO-1636 Clinical implementation of AI-based contouring workflows from commissioning to automated routine QA                                                                                       | 10.1016/S0167-8140(22)03600-3                                             | The European Society for Radiotherapy and Oncology                       | NI     | Abstract |
| Guthier et al.     | 2022 | Twin AI Algorithms for Quality Control of Auto-Segmentation in Radiation Therapy                                                                                                                  | <a href="https://w4.aapm.org/meetings/">https://w4.aapm.org/meetings/</a> | American Association of Physicists in Medicine Annual Meeting            | Oral   | Abstract |
| Hassan et al.      | 2021 | Abstract P266: The Implementation of Artificial Intelligence Significantly Reduces Door-In Door-Out Times in Primary Care Center Prior to Transfer                                                | 10.1161/str.52.suppl_1.P266                                               | American Stroke Association International Stroke Conference              | Poster | Abstract |
| Hsu et al.         | 2022 | Pilot Implementation of AI Gtvs for SRS zo Brain Metastases                                                                                                                                       | 10.1002/mp.15769                                                          | American Association of Physicists in Medicine Annual Meeting            | Oral   | Abstract |
| Jekel et al.       | 2022 | Nimg-02. Pacs-Integrated Auto-Segmentation Workflow For Brain Metastases Using Nnu-Net                                                                                                            | 10.1093/neuonc/noac209.622                                                | Society for Neuro-Oncology's Annual Scientific Meeting and Education Day | Poster | Abstract |
| Lachter et al.     | 2022 | Impacts Of A Novel Ai-Enabled Polyp Detection System: A Prospective Randomized Clinical Trial                                                                                                     | 10.1002/ueg2.12293                                                        | United European Gastroenterology Week                                    | Oral   | Abstract |
| Lerner et al.      | 2022 | OC-0779 MRI-only radiotherapy of gliomas – a prospective clinical study                                                                                                                           | 10.1016/S0167-8140(22)02685-8                                             | The European Society for Radiotherapy and Oncology                       | NI     | Abstract |
| Levartovsky et al. | 2023 | P267 Real-world artificial intelligence-aided colonoscopy does not improve adenoma detection rates in patients with Inflammatory Bowel Disease                                                    | 10.1093/ecco-jcc/jjac190.0397                                             | European Crohn's and Colitis Organisation Congress Copenhagen            | Poster | Abstract |
| Lucido et al.      | 2022 | A Prospective Observational Study of Clinical Acceptability of Deep Learning Model for the Automated Segmentation of Organs at Risk for Head and Neck Radiotherapy Treatment Planning             | 10.1016/j.ijrobp.2022.07.940                                              | American Society for Radiation Oncology Annual Meeting                   | Poster | Abstract |
| Lui et al.         | 2022 | Chest radiograph screening of lung nodules by artificial intelligence algorithm enabling real-time decision support in emergency departments                                                      | 10.1177/10249079221099636                                                 | Asian Conference on Emergency Medicine                                   | Oral   | Abstract |
| Ma et al.          | 2020 | OC-0343 Artificial Intelligence Based Auto-Contouring of CTV for Cervical Cancer                                                                                                                  | 10.1016/S0167-8140(21)00367-4                                             | The European Society for Radiotherapy and Oncology                       | NI     | Abstract |
| Manjunath et al.   | 2023 | Abstract P5-04-03: Analyzing the performance of Thermalix, an AI-based breast cancer screening solution, in a community setting                                                                   | 10.1158/1538-7445.SABCS22-P5-04-03                                        | San Antonio Breast Cancer Symposium                                      | Poster | Abstract |
| Martin et al.      | 2022 | A Systematic And Universal Artificial Intelligence Method For Oropharyngeal Dysphagia Screening: Accuracy Of Machine Learning Is Higher Than Classic Multivariate Analysis                        | 10.1002/ueg2.12294                                                        | United European Gastroenterology Week                                    | Poster | Abstract |

|                      |      |                                                                                                                                                               |                                                                                                                                         |                                                                         |        |          |
|----------------------|------|---------------------------------------------------------------------------------------------------------------------------------------------------------------|-----------------------------------------------------------------------------------------------------------------------------------------|-------------------------------------------------------------------------|--------|----------|
| Misawa et al.        | 2022 | A Prospective Study Of Real-Time Computer-Aided Characterization Of Colorectal Lesions: Diagnostic Performance And Impact On Human Diagnosis                  | 10.1016/j.gie.2022.04.586                                                                                                               | Digestive Disease Week                                                  | Poster | Abstract |
| Mohammadzadeh et al. | 2022 | Detection of Glaucoma Progression on Longitudinal Series of Macular Optical Coherence Tomography Angiography Maps with a Deep Learning Model                  | <a href="https://iovs.arvojournals.org/article.aspx?articleid=2782927">https://iovs.arvojournals.org/article.aspx?articleid=2782927</a> | The Association for Research in Vision and Ophthalmology Annual Meeting | Poster | Abstract |
| Nagamine et al.      | 2022 | Abstract WMP67: Evaluation Of The Implementation Of An Ai Tool For Large Vessel Occlusion: Impact On Radiologists' Workflow And Patient Outcomes              | 10.1161/str.53.suppl_1.WMP67                                                                                                            | International Stroke Conference                                         | Poster | Abstract |
| Najac et al.         | 2022 | Follow Up Metrics in Primary Care Clinics after Implementation of an Artificial Intelligence Assisted Telemedicine Screening Program for Diabetic Retinopathy | <a href="https://iovs.arvojournals.org/article.aspx?articleid=2780621">https://iovs.arvojournals.org/article.aspx?articleid=2780621</a> | The Association for Research in Vision and Ophthalmology Annual Meeting | Poster | Abstract |
| Nakamura et al.      | 2019 | A clinically applicable deep learning model for segmentation in the prostate region                                                                           | 10.1016/S0167-8140(19)32462-4                                                                                                           | The European SocieTy for Radiotherapy and Oncology                      | Poster | Abstract |
| Ng et al.            | 2022 | Safe and effective integration of AI as supporting reader in double reading breast cancer screening                                                           | 10.1186/s13244-022-01337-x                                                                                                              | European Congress of Radiology                                          | Oral   | Abstract |
| Nikola et al.        | 2023 | AI-Assisted Imaging Implementation Within A Supraregional Mechanical Thrombectomy Network                                                                     | 10.1177/17474930221142512                                                                                                               | UK Stroke Forum                                                         | NI     | Abstract |
| Oberije et al.       | 2022 | Post-market real-world data demonstrating use of an AI system as an extra reader to augment breast cancer detection without unnecessary recalls               | 10.1186/s13244-022-01337-x                                                                                                              | European Congress of Radiology                                          | Oral   | Abstract |
| Parthasarathy et al. | 2022 | Performance of an Automated, Deep Learning-Based Tool to Screen for Age-Related Macular Degeneration (AMD)                                                    | <a href="https://iovs.arvojournals.org/article.aspx?articleid=2783124">https://iovs.arvojournals.org/article.aspx?articleid=2783124</a> | The Association for Research in Vision and Ophthalmology Annual Meeting | Poster | Abstract |
| Parwani et al.       | 2020 | Large Scale Deployment of Whole Slide Imaging for Anatomical Pathology Workflow Improvement and Primary Diagnosis and Consult Reviews                         | 10.1038/s41374-020-0393-8                                                                                                               | United States and Canadian Academy of Pathology Annual Meeting          | Poster | Abstract |
| Pohlkamp et al.      | 2021 | A Completely Digital Workflow for Differentials in Bone Marrow Cytomorphology Supported By Machine Learning Provides Promising Results in Object Detection    | 10.1182/blood-2021-152851                                                                                                               | American Society of Hematology Annual Meeting                           | NI     | Abstract |
| Raoux et al.         | 2021 | Novel AI-Based Solution for Supporting Prostate Cancer Diagnosis Increases the Efficiency and Accuracy of Reporting in Clinical Routine                       | 10.1038/s41374-021-00558-w                                                                                                              | United States and Canadian Academy of Pathology Annual Meeting          | NI     | Abstract |
| Repici et al.        | 2020 | 876 Real-Time Computer Aided Diagnosis For Detection Of Colorectal Neoplasia At Colonoscopy                                                                   | 10.1016/j.gie.2020.03.604                                                                                                               | Digestive Disease Week                                                  | Oral   | Abstract |
| Rose et al.          | 2022 | Img-11. A Computerised Clinical Decision Support System For Diagnosing Children's Brain Tumours Using Functional Imaging And Machine Learning                 | 10.1093/neuonc/noac079.287                                                                                                              | International Symposium on Pediatric Neuro-Oncology                     | NI     | Abstract |
| Sandbank et al.      | 2022 | Validation and Clinical Deployment of an AI-Based Algorithm for Detection of Gastric Adenocarcinoma and H. Pylori in Gastric Biopsies                         | <a href="https://ibex-ai.com/wp-content/">https://ibex-ai.com/wp-content/</a>                                                           | United States and Canadian Academy of Pathology Annual Meeting          | Poster | Poster   |
| Silva P et al.       | 2022 | Automated machine learning (AutoML) model for diabetic retinopathy (DR) image classification from ultrawide field (UWF) retinal images                        | <a href="https://iovs.arvojournals.org/article.aspx?articleid=2782543">https://iovs.arvojournals.org/article.aspx?articleid=2782543</a> | The Association for Research in Vision and Ophthalmology Annual Meeting | Poster | Abstract |



|                         |      |                                                                                                                                                                                     |                                                                                                                                         |                                                                                        |      |                  |
|-------------------------|------|-------------------------------------------------------------------------------------------------------------------------------------------------------------------------------------|-----------------------------------------------------------------------------------------------------------------------------------------|----------------------------------------------------------------------------------------|------|------------------|
| Sukmanov et al.         | 2022 | Successful deployment of an AI solution for prostate biopsies                                                                                                                       | 10.1007/s00428-022-03379-4                                                                                                              | European Congress of Pathology                                                         | Oral | Abstract         |
| Takaishi                | 2022 | The Use Of Artificial Intelligence System To Detect Lung Nodules On Ct Scan In Real Clinical Settings                                                                               | 10.1016/j.chest.2021.12.349                                                                                                             | CHEST Congress                                                                         | NI   | Abstract         |
| Taylor et al.           | 2022 | MO012: Development of an Accurate Automated Segmentation Algorithm to Measure Total Kidney Volume in ADPKD Suitable for Clinical Application (The Cystvas Study)                    | 10.1093/ndt/gfac061.007                                                                                                                 | European Renal Association Congress                                                    | Oral | Abstract         |
| Ting et al.             | 2020 | Artificial Intelligence-Assisted Diabetic Retinopathy Screening Program: A 5-year Bench to Bedside Translational Study                                                              | <a href="https://iovs.arvojournals.org/article.aspx?articleid=2767329">https://iovs.arvojournals.org/article.aspx?articleid=2767329</a> | The Association for Research in Vision and Ophthalmology Annual Meeting                | NI   | Abstract         |
| Wismüller & Stockmaster | 2020 | A Prospective Randomized Clinical Trial for Measuring Radiology Study Reporting Time on Artificial Intelligence-Based Detection of Intracranial Hemorrhage in Emergent Care Head CT | 10.48550/ARXIV.2002.12515                                                                                                               | The International Society for Optics und Photonics Medical Imaging Conference          | Oral | Conference Paper |
| Yeo et al.              | 2022 | A deep learning algorithm for the automatic detection of intracranial haemorrhage on CT head imaging                                                                                | 10.1186/s13244-022-01337-x                                                                                                              | European Congress of Radiology                                                         | Oral | Abstract         |
| Yi et al.               | 2020 | Identification of Intracranial Hemorrhage Using an Original Artificial Intelligence System                                                                                          | 10.1111/acem.13961                                                                                                                      | Society for Academic Emergency Medicine Annual Meeting                                 | NI   | Abstract         |
| Younis et al.           | 2022 | Integrating artificial Intelligence algorithms with DICOM structured reporting into clinical workflows                                                                              | 10.1186/s13244-022-01337-x                                                                                                              | European Congress of Radiology                                                         | Oral | Abstract         |
| Zia et al.              | 2021 | Clinical use of Aidoc “Always-On AI”: Does it help increase radiologists’ efficiency and improve patient care?                                                                      | 10.1111/1754-9485.13298                                                                                                                 | The Royal Australian and New Zealand College of Radiologists Annual Scientific Meeting | Oral | Abstract         |

Notes: NI = No information

## SUPPLEMENTARY FIGURE 8: AMSTAR-2 CHECKLIST

The AMSTAR-2 (A MeaSurement Tool to Assess Systematic Reviews) critical appraisal tool for systematic reviews of randomized and/or non-randomized healthcare intervention studies was used to assess the quality of our review.

| AMSTAR 2                                                                                                                                                                                                                  |                                                                                                        |                                                 |
|---------------------------------------------------------------------------------------------------------------------------------------------------------------------------------------------------------------------------|--------------------------------------------------------------------------------------------------------|-------------------------------------------------|
| <b>1. Did the research questions and inclusion criteria for the review include the components of PICO?</b>                                                                                                                |                                                                                                        |                                                 |
| For Yes:                                                                                                                                                                                                                  | Optional (recommended)                                                                                 |                                                 |
| <input checked="" type="checkbox"/> Population                                                                                                                                                                            | <input type="checkbox"/> Timeframe for follow-up                                                       | <input checked="" type="checkbox"/> Yes         |
| <input checked="" type="checkbox"/> Intervention                                                                                                                                                                          |                                                                                                        | <input type="checkbox"/> No                     |
| <input checked="" type="checkbox"/> Comparator group                                                                                                                                                                      |                                                                                                        |                                                 |
| <input checked="" type="checkbox"/> Outcome                                                                                                                                                                               |                                                                                                        |                                                 |
| <b>2. Did the report of the review contain an explicit statement that the review methods were established prior to the conduct of the review and did the report justify any significant deviations from the protocol?</b> |                                                                                                        |                                                 |
| For Partial Yes:<br>The authors state that they had a written protocol or guide that included ALL the following:                                                                                                          | For Yes:<br>As for partial yes, plus the protocol should be registered and should also have specified: |                                                 |
| <input checked="" type="checkbox"/> review question(s)                                                                                                                                                                    | <input checked="" type="checkbox"/> a meta-analysis/synthesis plan, if appropriate, <i>and</i>         | <input checked="" type="checkbox"/> Yes         |
| <input checked="" type="checkbox"/> a search strategy                                                                                                                                                                     | <input checked="" type="checkbox"/> a plan for investigating causes of heterogeneity                   | <input type="checkbox"/> Partial Yes            |
| <input checked="" type="checkbox"/> inclusion/exclusion criteria                                                                                                                                                          | <input checked="" type="checkbox"/> justification for any deviations from the protocol                 | <input type="checkbox"/> No                     |
| <input checked="" type="checkbox"/> a risk of bias assessment                                                                                                                                                             |                                                                                                        |                                                 |
| <b>3. Did the review authors explain their selection of the study designs for inclusion in the review?</b>                                                                                                                |                                                                                                        |                                                 |
| For Yes, the review should satisfy ONE of the following:                                                                                                                                                                  |                                                                                                        |                                                 |
| <input type="checkbox"/> <i>Explanation for</i> including only RCTs                                                                                                                                                       |                                                                                                        | <input checked="" type="checkbox"/> Yes         |
| <input type="checkbox"/> <i>OR Explanation for</i> including only NRSI                                                                                                                                                    |                                                                                                        | <input type="checkbox"/> No                     |
| <input checked="" type="checkbox"/> <i>OR Explanation for</i> including both RCTs and NRSI                                                                                                                                |                                                                                                        |                                                 |
| <b>4. Did the review authors use a comprehensive literature search strategy?</b>                                                                                                                                          |                                                                                                        |                                                 |
| For Partial Yes (all the following):                                                                                                                                                                                      | For Yes, should also have (all the following):                                                         |                                                 |
| <input checked="" type="checkbox"/> searched at least 2 databases (relevant to research question)                                                                                                                         | <input checked="" type="checkbox"/> searched the reference lists/bibliographies of included studies    | <input type="checkbox"/> Yes                    |
| <input checked="" type="checkbox"/> provided key word and/or search strategy                                                                                                                                              | <input checked="" type="checkbox"/> searched trial/study registries                                    | <input checked="" type="checkbox"/> Partial Yes |
| <input checked="" type="checkbox"/> justified publication restrictions (eg, language)                                                                                                                                     | <input type="checkbox"/> included/consulted content experts in the field                               | <input type="checkbox"/> No                     |
|                                                                                                                                                                                                                           | <input type="checkbox"/> where relevant, searched for grey literature                                  |                                                 |
|                                                                                                                                                                                                                           | <input checked="" type="checkbox"/> conducted search within 24 months of completion of the review      |                                                 |
| <b>5. Did the review authors perform study selection in duplicate?</b>                                                                                                                                                    |                                                                                                        |                                                 |
| For Yes, either ONE of the following:                                                                                                                                                                                     |                                                                                                        |                                                 |
| <input checked="" type="checkbox"/> at least two reviewers independently agreed on selection of eligible studies and achieved consensus on which studies to include                                                       |                                                                                                        | <input checked="" type="checkbox"/> Yes         |
| <input type="checkbox"/> OR two reviewers selected a sample of eligible studies <u>and</u> achieved good agreement (at least 80 per cent), with the remainder selected by one reviewer                                    |                                                                                                        | <input type="checkbox"/> No                     |
| <b>6. Did the review authors perform data extraction in duplicate?</b>                                                                                                                                                    |                                                                                                        |                                                 |
| For Yes, either ONE of the following:                                                                                                                                                                                     |                                                                                                        |                                                 |
| <input checked="" type="checkbox"/> at least two reviewers achieved consensus on which data to extract                                                                                                                    |                                                                                                        | <input checked="" type="checkbox"/> Yes         |

|                                                                                                                                                                                                                                                      |                             |
|------------------------------------------------------------------------------------------------------------------------------------------------------------------------------------------------------------------------------------------------------|-----------------------------|
| <input type="checkbox"/> from included studies<br><input type="checkbox"/> OR two reviewers extracted data from a sample of eligible studies <u>and</u> achieved good agreement (at least 80 per cent), with the remainder extracted by one reviewer | <input type="checkbox"/> No |
|------------------------------------------------------------------------------------------------------------------------------------------------------------------------------------------------------------------------------------------------------|-----------------------------|

**7. Did the review authors provide a list of excluded studies and justify the exclusions?**

|                                                                                                                                                                           |                                                                                                                                            |                                                                                                                |
|---------------------------------------------------------------------------------------------------------------------------------------------------------------------------|--------------------------------------------------------------------------------------------------------------------------------------------|----------------------------------------------------------------------------------------------------------------|
| For Partial Yes:<br><input checked="" type="checkbox"/> provided a list of all potentially relevant studies that were read in full text form but excluded from the review | For Yes, must also have:<br><input checked="" type="checkbox"/> Justified the exclusion from the review of each potentially relevant study | <input checked="" type="checkbox"/> Yes<br><input type="checkbox"/> Partial Yes<br><input type="checkbox"/> No |
|---------------------------------------------------------------------------------------------------------------------------------------------------------------------------|--------------------------------------------------------------------------------------------------------------------------------------------|----------------------------------------------------------------------------------------------------------------|

**8. Did the review authors describe the included studies in adequate detail?**

|                                                                                                                                                                                                                                                                                                                                                           |                                                                                                                                                                                                                                                                                                                                                                      |                                                                                                                |
|-----------------------------------------------------------------------------------------------------------------------------------------------------------------------------------------------------------------------------------------------------------------------------------------------------------------------------------------------------------|----------------------------------------------------------------------------------------------------------------------------------------------------------------------------------------------------------------------------------------------------------------------------------------------------------------------------------------------------------------------|----------------------------------------------------------------------------------------------------------------|
| For Partial Yes (ALL the following):<br><input checked="" type="checkbox"/> described populations<br><input checked="" type="checkbox"/> described interventions<br><input checked="" type="checkbox"/> described comparators<br><input checked="" type="checkbox"/> described outcomes<br><input checked="" type="checkbox"/> described research designs | For Yes, should also have ALL the following:<br><input checked="" type="checkbox"/> described population in detail<br><input checked="" type="checkbox"/> described intervention and comparator in detail (including doses where relevant)<br><input checked="" type="checkbox"/> described study's setting<br><input type="checkbox"/> timeframe for follow-up N.A. | <input checked="" type="checkbox"/> Yes<br><input type="checkbox"/> Partial Yes<br><input type="checkbox"/> No |
|-----------------------------------------------------------------------------------------------------------------------------------------------------------------------------------------------------------------------------------------------------------------------------------------------------------------------------------------------------------|----------------------------------------------------------------------------------------------------------------------------------------------------------------------------------------------------------------------------------------------------------------------------------------------------------------------------------------------------------------------|----------------------------------------------------------------------------------------------------------------|

**9. Did the review authors use a satisfactory technique for assessing the risk of bias (RoB) in individual studies that were included in the review?**

|                                                                                                                                                                                                                                                                                                    |                                                                                                                                                                                                                                                                                         |                                                                                                                                                               |
|----------------------------------------------------------------------------------------------------------------------------------------------------------------------------------------------------------------------------------------------------------------------------------------------------|-----------------------------------------------------------------------------------------------------------------------------------------------------------------------------------------------------------------------------------------------------------------------------------------|---------------------------------------------------------------------------------------------------------------------------------------------------------------|
| <b>RCTs</b>                                                                                                                                                                                                                                                                                        |                                                                                                                                                                                                                                                                                         |                                                                                                                                                               |
| For Partial Yes, must have assessed RoB from:<br><input checked="" type="checkbox"/> unconcealed allocation, <i>and</i><br><input checked="" type="checkbox"/> lack of blinding of patients and assessors when assessing outcomes (unnecessary for objective outcomes such as all cause mortality) | For Yes, must also have assessed RoB from:<br><input checked="" type="checkbox"/> allocation sequence that was not truly random, <i>and</i><br><input checked="" type="checkbox"/> selection of the reported result from among multiple measurements or analyses of a specified outcome | <input checked="" type="checkbox"/> Yes<br><input type="checkbox"/> Partial Yes<br><input type="checkbox"/> No<br><input type="checkbox"/> Includes only NRSI |
| <b>NRSI</b>                                                                                                                                                                                                                                                                                        |                                                                                                                                                                                                                                                                                         |                                                                                                                                                               |
| For Partial Yes, must have assessed RoB:<br><input checked="" type="checkbox"/> from confounding, <i>and</i><br><input checked="" type="checkbox"/> from selection bias                                                                                                                            | For Yes, must also have assessed RoB:<br><input checked="" type="checkbox"/> methods used to ascertain exposures and outcomes, <i>and</i><br><input checked="" type="checkbox"/> selection of the reported result from among multiple measurements or analyses of a specified outcome   | <input checked="" type="checkbox"/> Yes<br><input type="checkbox"/> Partial Yes<br><input type="checkbox"/> No<br><input type="checkbox"/> Includes only RCTs |

**10. Did the review authors report on the sources of funding for the studies included in the review?**

|                                                                                                                                                                                                                                                                   |                                                                        |
|-------------------------------------------------------------------------------------------------------------------------------------------------------------------------------------------------------------------------------------------------------------------|------------------------------------------------------------------------|
| For Yes<br><input checked="" type="checkbox"/> Must have reported on the sources of funding for individual studies included in the review. Note: Reporting that the reviewers looked for this information but it was not reported by study authors also qualifies | <input checked="" type="checkbox"/> Yes<br><input type="checkbox"/> No |
|-------------------------------------------------------------------------------------------------------------------------------------------------------------------------------------------------------------------------------------------------------------------|------------------------------------------------------------------------|

**11. If meta-analysis was performed did the review authors use appropriate methods for statistical combination of results?**

|                                                                                                                                                                                                                                                                       |                                                                                                                     |
|-----------------------------------------------------------------------------------------------------------------------------------------------------------------------------------------------------------------------------------------------------------------------|---------------------------------------------------------------------------------------------------------------------|
| <b>RCTs</b>                                                                                                                                                                                                                                                           |                                                                                                                     |
| For Yes:<br><input checked="" type="checkbox"/> The authors justified combining the data in a meta-analysis<br><input checked="" type="checkbox"/> AND they used an appropriate weighted technique to combine study results and adjusted for heterogeneity if present | <input checked="" type="checkbox"/> Yes<br><input type="checkbox"/> No<br><input type="checkbox"/> No meta-analysis |



|                                                                                                                                                                                                                                                                                                                                                                                                                                                                                                                                                                                                                                                             |                                                                                                                               |
|-------------------------------------------------------------------------------------------------------------------------------------------------------------------------------------------------------------------------------------------------------------------------------------------------------------------------------------------------------------------------------------------------------------------------------------------------------------------------------------------------------------------------------------------------------------------------------------------------------------------------------------------------------------|-------------------------------------------------------------------------------------------------------------------------------|
| <input checked="" type="checkbox"/> AND investigated the causes of any heterogeneity                                                                                                                                                                                                                                                                                                                                                                                                                                                                                                                                                                        | conducted                                                                                                                     |
| <b>For NRSI</b><br>For Yes:                                                                                                                                                                                                                                                                                                                                                                                                                                                                                                                                                                                                                                 |                                                                                                                               |
| <input checked="" type="checkbox"/> The authors justified combining the data in a meta-analysis<br><input checked="" type="checkbox"/> AND they used an appropriate weighted technique to combine study results, adjusting for heterogeneity if present<br><input checked="" type="checkbox"/> AND they statistically combined effect estimates from NRSI that were adjusted for confounding, rather than combining raw data, or justified combining raw data when adjusted effect estimates were not available<br><input type="checkbox"/> AND they reported separate summary estimates for RCTs and NRSI separately when both were included in the review | <input type="checkbox"/> Yes<br><input checked="" type="checkbox"/> No<br><input type="checkbox"/> No meta-analysis conducted |
| <b>12. If meta-analysis was performed, did the review authors assess the potential impact of RoB in individual studies on the results of the meta-analysis or other evidence synthesis?</b>                                                                                                                                                                                                                                                                                                                                                                                                                                                                 |                                                                                                                               |
| For Yes:                                                                                                                                                                                                                                                                                                                                                                                                                                                                                                                                                                                                                                                    |                                                                                                                               |
| <input type="checkbox"/> included only low risk of bias RCTs<br><input checked="" type="checkbox"/> OR, if the pooled estimate was based on RCTs and/or NRSI at variable RoB, the authors performed analyses to investigate possible impact of RoB on summary estimates of effect                                                                                                                                                                                                                                                                                                                                                                           | <input checked="" type="checkbox"/> Yes<br><input type="checkbox"/> No<br><input type="checkbox"/> No meta-analysis conducted |
| <b>13. Did the review authors account for RoB in individual studies when interpreting/discussing the results of the review?</b>                                                                                                                                                                                                                                                                                                                                                                                                                                                                                                                             |                                                                                                                               |
| For Yes:                                                                                                                                                                                                                                                                                                                                                                                                                                                                                                                                                                                                                                                    |                                                                                                                               |
| <input type="checkbox"/> included only low risk of bias RCTs<br><input checked="" type="checkbox"/> OR, if RCTs with moderate or high RoB, or NRSI were included the review provided a discussion of the likely impact of RoB on the results                                                                                                                                                                                                                                                                                                                                                                                                                | <input checked="" type="checkbox"/> Yes<br><input type="checkbox"/> No                                                        |
| <b>14. Did the review authors provide a satisfactory explanation for, and discussion of, any heterogeneity observed in the results of the review?</b>                                                                                                                                                                                                                                                                                                                                                                                                                                                                                                       |                                                                                                                               |
| For Yes:                                                                                                                                                                                                                                                                                                                                                                                                                                                                                                                                                                                                                                                    |                                                                                                                               |
| <input type="checkbox"/> There was no significant heterogeneity in the results<br><input checked="" type="checkbox"/> OR if heterogeneity was present the authors performed an investigation of sources of any heterogeneity in the results and discussed the impact of this on the results of the review                                                                                                                                                                                                                                                                                                                                                   | <input checked="" type="checkbox"/> Yes<br><input type="checkbox"/> No                                                        |
| <b>15. If they performed quantitative synthesis did the review authors carry out an adequate investigation of publication bias (small study bias) and discuss its likely impact on the results of the review?</b>                                                                                                                                                                                                                                                                                                                                                                                                                                           |                                                                                                                               |
| For Yes:                                                                                                                                                                                                                                                                                                                                                                                                                                                                                                                                                                                                                                                    |                                                                                                                               |
| <input checked="" type="checkbox"/> performed graphical or statistical tests for publication bias and discussed the likelihood and magnitude of impact of publication bias                                                                                                                                                                                                                                                                                                                                                                                                                                                                                  | <input checked="" type="checkbox"/> Yes<br><input type="checkbox"/> No<br><input type="checkbox"/> No meta-analysis conducted |
| <b>16. Did the review authors report any potential sources of conflict of interest, including any funding they received for conducting the review?</b>                                                                                                                                                                                                                                                                                                                                                                                                                                                                                                      |                                                                                                                               |
| For Yes:                                                                                                                                                                                                                                                                                                                                                                                                                                                                                                                                                                                                                                                    |                                                                                                                               |
| <input checked="" type="checkbox"/> The authors reported no competing interests OR<br><input type="checkbox"/> The authors described their funding sources and how they managed potential conflicts of interest                                                                                                                                                                                                                                                                                                                                                                                                                                             | <input checked="" type="checkbox"/> Yes<br><input type="checkbox"/> No                                                        |

**SUPPLEMENTARY TABLE 3: PRISMA REPORTING CHECKLIST**

| Section and Topic             | Item # | Checklist item                                                                                                                                                                                                                                                                                       | Location where item is reported |
|-------------------------------|--------|------------------------------------------------------------------------------------------------------------------------------------------------------------------------------------------------------------------------------------------------------------------------------------------------------|---------------------------------|
| <b>TITLE</b>                  |        |                                                                                                                                                                                                                                                                                                      |                                 |
| Title                         | 1      | Identify the report as a systematic review.                                                                                                                                                                                                                                                          | 1                               |
| <b>ABSTRACT</b>               |        |                                                                                                                                                                                                                                                                                                      |                                 |
| Abstract                      | 2      | See the PRISMA 2020 for Abstracts checklist.                                                                                                                                                                                                                                                         | 2                               |
| <b>INTRODUCTION</b>           |        |                                                                                                                                                                                                                                                                                                      |                                 |
| Rationale                     | 3      | Describe the rationale for the review in the context of existing knowledge.                                                                                                                                                                                                                          | 3                               |
| Objectives                    | 4      | Provide an explicit statement of the objective(s) or question(s) the review addresses.                                                                                                                                                                                                               | 3                               |
| <b>METHODS</b>                |        |                                                                                                                                                                                                                                                                                                      |                                 |
| Eligibility criteria          | 5      | Specify the inclusion and exclusion criteria for the review and how studies were grouped for the syntheses.                                                                                                                                                                                          | 14-16                           |
| Information sources           | 6      | Specify all databases, registers, websites, organisations, reference lists and other sources searched or consulted to identify studies. Specify the date when each source was last searched or consulted.                                                                                            | 14-15, 17-18                    |
| Search strategy               | 7      | Present the full search strategies for all databases, registers and websites, including any filters and limits used.                                                                                                                                                                                 | Supplementary Note 1-2          |
| Selection process             | 8      | Specify the methods used to decide whether a study met the inclusion criteria of the review, including how many reviewers screened each record and each report retrieved, whether they worked independently, and if applicable, details of automation tools used in the process.                     | 16                              |
| Data collection process       | 9      | Specify the methods used to collect data from reports, including how many reviewers collected data from each report, whether they worked independently, any processes for obtaining or confirming data from study investigators, and if applicable, details of automation tools used in the process. | 16                              |
| Data items                    | 10a    | List and define all outcomes for which data were sought. Specify whether all results that were compatible with each outcome domain in each study were sought (e.g. for all measures, time points, analyses), and if not, the methods used to decide which results to collect.                        | 15-16                           |
|                               | 10b    | List and define all other variables for which data were sought (e.g. participant and intervention characteristics, funding sources). Describe any assumptions made about any missing or unclear information.                                                                                         | 15                              |
| Study risk of bias assessment | 11     | Specify the methods used to assess risk of bias in the included studies, including details of the tool(s) used, how many reviewers assessed each study and whether they worked independently, and if applicable, details of automation tools used in the process.                                    | 16-17                           |
| Effect measures               | 12     | Specify for each outcome the effect measure(s) (e.g. risk ratio, mean difference) used in the synthesis or presentation of results.                                                                                                                                                                  | 17                              |
| Synthesis methods             | 13a    | Describe the processes used to decide which studies were eligible for each synthesis (e.g. tabulating the study intervention characteristics and comparing against the planned groups for each synthesis (item #5)).                                                                                 | 17                              |
|                               | 13b    | Describe any methods required to prepare the data for presentation or synthesis, such as handling of missing summary statistics, or data conversions.                                                                                                                                                | 17                              |
|                               | 13c    | Describe any methods used to tabulate or visually display results of individual studies and syntheses.                                                                                                                                                                                               | 17                              |

| Section and Topic             | Item # | Checklist item                                                                                                                                                                                                                                                                       | Location where item is reported |
|-------------------------------|--------|--------------------------------------------------------------------------------------------------------------------------------------------------------------------------------------------------------------------------------------------------------------------------------------|---------------------------------|
|                               | 13d    | Describe any methods used to synthesize results and provide a rationale for the choice(s). If meta-analysis was performed, describe the model(s), method(s) to identify the presence and extent of statistical heterogeneity, and software package(s) used.                          | 17                              |
|                               | 13e    | Describe any methods used to explore possible causes of heterogeneity among study results (e.g. subgroup analysis, meta-regression).                                                                                                                                                 | 17                              |
|                               | 13f    | Describe any sensitivity analyses conducted to assess robustness of the synthesized results.                                                                                                                                                                                         | 17-18                           |
| Reporting bias assessment     | 14     | Describe any methods used to assess risk of bias due to missing results in a synthesis (arising from reporting biases).                                                                                                                                                              | 17-18                           |
| Certainty assessment          | 15     | Describe any methods used to assess certainty (or confidence) in the body of evidence for an outcome.                                                                                                                                                                                | 18                              |
| <b>RESULTS</b>                |        |                                                                                                                                                                                                                                                                                      |                                 |
| Study selection               | 16a    | Describe the results of the search and selection process, from the number of records identified in the search to the number of studies included in the review, ideally using a flow diagram.                                                                                         | 4, Figure 1                     |
|                               | 16b    | Cite studies that might appear to meet the inclusion criteria, but which were excluded, and explain why they were excluded.                                                                                                                                                          | Supplementary Table 1-2         |
| Study characteristics         | 17     | Cite each included study and present its characteristics.                                                                                                                                                                                                                            | Table 1                         |
| Risk of bias in studies       | 18     | Present assessments of risk of bias for each included study.                                                                                                                                                                                                                         | Supplementary Figure 1-2        |
| Results of individual studies | 19     | For all outcomes, present, for each study: (a) summary statistics for each group (where appropriate) and (b) an effect estimate and its precision (e.g. confidence/credible interval), ideally using structured tables or plots.                                                     | Table 4                         |
| Results of syntheses          | 20a    | For each synthesis, briefly summarise the characteristics and risk of bias among contributing studies.                                                                                                                                                                               | 4-6                             |
|                               | 20b    | Present results of all statistical syntheses conducted. If meta-analysis was done, present for each the summary estimate and its precision (e.g. confidence/credible interval) and measures of statistical heterogeneity. If comparing groups, describe the direction of the effect. | 7-8, Figure 3                   |
|                               | 20c    | Present results of all investigations of possible causes of heterogeneity among study results.                                                                                                                                                                                       | 7-8                             |
|                               | 20d    | Present results of all sensitivity analyses conducted to assess the robustness of the synthesized results.                                                                                                                                                                           | 9-10                            |
| Reporting biases              | 21     | Present assessments of risk of bias due to missing results (arising from reporting biases) for each synthesis assessed.                                                                                                                                                              | Supplementary Figure 5-7        |
| Certainty of evidence         | 22     | Present assessments of certainty (or confidence) in the body of evidence for each outcome assessed.                                                                                                                                                                                  | Supplementary Figure 3-4        |
| <b>DISCUSSION</b>             |        |                                                                                                                                                                                                                                                                                      |                                 |
| Discussion                    | 23a    | Provide a general interpretation of the results in the context of other evidence.                                                                                                                                                                                                    | 10-12                           |

| Section and Topic                              | Item # | Checklist item                                                                                                                                                                                                                             | Location where item is reported |
|------------------------------------------------|--------|--------------------------------------------------------------------------------------------------------------------------------------------------------------------------------------------------------------------------------------------|---------------------------------|
|                                                | 23b    | Discuss any limitations of the evidence included in the review.                                                                                                                                                                            | 13                              |
|                                                | 23c    | Discuss any limitations of the review processes used.                                                                                                                                                                                      | 13                              |
|                                                | 23d    | Discuss implications of the results for practice, policy, and future research.                                                                                                                                                             | 14                              |
| <b>OTHER INFORMATION</b>                       |        |                                                                                                                                                                                                                                            |                                 |
| Registration and protocol                      | 24a    | Provide registration information for the review, including register name and registration number, or state that the review was not registered.                                                                                             | 2, 14                           |
|                                                | 24b    | Indicate where the review protocol can be accessed, or state that a protocol was not prepared.                                                                                                                                             | 14                              |
|                                                | 24c    | Describe and explain any amendments to information provided at registration or in the protocol.                                                                                                                                            | 16-17                           |
| Support                                        | 25     | Describe sources of financial or non-financial support for the review, and the role of the funders or sponsors in the review.                                                                                                              | 18                              |
| Competing interests                            | 26     | Declare any competing interests of review authors.                                                                                                                                                                                         | 18                              |
| Availability of data, code and other materials | 27     | Report which of the following are publicly available and where they can be found: template data collection forms; data extracted from included studies; data used for all analyses; analytic code; any other materials used in the review. | 18                              |

From: Page MJ, McKenzie JE, Bossuyt PM, Boutron I, Hoffmann TC, Mulrow CD, et al. The PRISMA 2020 statement: an updated guideline for reporting systematic reviews. BMJ 2021;372:n71. doi: 10.1136/bmj.n71

**SUPPLEMENTARY TABLE 4: PICO STATEMENT**

|                     | CONNECTOR | SEARCH TERM                                                                                                                                                                                                                                                                                       |
|---------------------|-----------|---------------------------------------------------------------------------------------------------------------------------------------------------------------------------------------------------------------------------------------------------------------------------------------------------|
| <b>POPULATION</b>   |           | "hospital" OR "clinic" OR "healthcare" OR "health care delivery" OR "clinical care" OR "medical" OR physician* OR clinician* OR doctor* OR nurse* OR "health care professional" OR "patient care" OR patient* OR surg* OR "oncology" OR "radiology" OR "health information"                       |
| <b>INTERVENTION</b> | AND       | "artificial intelligence" OR "machine intelligence" OR "machine learning" OR "deep learning" OR "neural network" OR "natural language processing" OR "AI " OR "automated image recognition" OR "decision-support" OR "AI application*"                                                            |
|                     | AND       | "adoption" OR "deploy*" OR "implementation" OR "integration"                                                                                                                                                                                                                                      |
|                     | AND       | diagnos* OR "Magnetic Resonance Imaging" OR MRI OR "computer tomography" OR imag* OR detect* OR "data interpretation" OR "information system*" OR "health information technology*" OR "health IT*" OR "medical informatics" OR "electronic health record*" OR "medical record*" OR "patient data" |
| <b>OUTCOMES</b>     | AND       | "workload" OR "work reduction" OR load* OR "cognitive load" OR demand* OR time* OR stress* OR "satisfaction" OR "usability" OR "workflow" OR efficienc* OR "work system" OR "work adaptation" OR "turnaround" OR "clinician outcome" OR "performance"                                             |

Source: Wenderott, K., Gambashidze, N., & Weigl, M. (2022). Integration of Artificial Intelligence Into Sociotechnical Work Systems—Effects of Artificial Intelligence Solutions in Medical Imaging on Clinical Efficiency: Protocol for a Systematic Literature Review. *JMIR Research Protocols*, 11(12), e40485. <https://doi.org/10.2196/40485>



## **SUPPLEMENTARY NOTE 1: DETAILED SEARCH STRATEGY**

### **Pubmed, Web of Science, CENTRAL**

*Filter: 2000-[date]*

("hospital" OR "clinic" OR "healthcare" OR "health care delivery" OR "clinical care" OR "medical" OR physician\* OR clinician\* OR doctor\* OR nurse\* OR "health care professional" OR "patient care" OR patient\* OR surg\* OR "oncology" OR "radiology" OR "health information")

AND ("artificial intelligence" OR "machine intelligence" OR "machine learning" OR "deep learning" OR "neural network" OR "natural language processing" OR "AI" OR "automated image recognition" OR "decision-support" OR "AI application\*")

AND ("adoption" OR "deploy\*" OR "implementation" OR "integration")

AND ("workload" OR "work reduction" OR load\* OR "cognitive load" OR demand\* OR time\* OR stress\* OR "satisfaction" OR "usability" OR "workflow" OR efficienc\* OR "work system" OR "work adaptation" OR "turnaround" OR "clinician outcome" OR "performance")

AND (diagnos\*[mh:noexp] OR "Magnetic Resonance Imaging" OR MRI[mh:noexp] OR "computer tomography" OR imag\*[mh:noexp] OR detect\* OR "data interpretation" OR "information system\*" OR "health information technology\*" OR "health IT\*" OR "medical informatics" OR "electronic health record\*" OR "medical record\*" OR "patient data")

### **Embase**

*Filter: 2000-[date]*

( hospital OR clinic OR healthcare OR "health care delivery" OR "clinical care" OR medical OR physician\* OR clinician\* OR doctor\* OR nurse\* OR "health care professional" OR "patient care" OR patient\* OR surg\* OR oncology OR radiology OR "health information" )

AND ( "artificial intelligence" OR "machine intelligence" OR "machine learning" OR "deep learning" OR "neural network" OR "natural language processing" OR AI OR "automated image recognition" OR decision-support OR "AI application\*" )

AND ( adoption OR deploy\* OR implementation OR integration )

AND ( workload OR "work reduction" OR load\* OR "cognitive load" OR demand\* OR time\* OR stress\* OR satisfaction OR usability OR workflow OR efficienc\* OR "work system" OR "work adaptation" OR turnaround OR "clinician outcome" OR performance )

AND (diagnos\*/ OR "Magnetic Resonance Imaging" OR MRI/ OR "computer tomography" OR imag\*/ OR detect\* OR "data interpretation" OR "information system\*" OR "health information technology\*" OR "health IT\*" OR "medical informatics" OR "electronic health record\*" OR "medical record\*" OR "patient data" )

### **Psycinfo (Ebsco)**

*Note: Did not accept capital letters, therefore small changes in search term*

*Filter: 2000-[date]*

(hospital OR clinic OR healthcareOR "health care delivery"OR "clinical care"OR medicalOR physician\*OR clinician\*OR doctor\*OR nurse\*OR "health care professional"OR "patient care"OR patient\*OR surg\*OR oncologyOR radiologyOR "health information")

AND ("artificial intelligence"OR "machine intelligence" OR "machine learning"OR "deep learning"OR "neural network"OR "natural language processing"OR "AI" OR "automated image recognition"OR decision-supportOR "AI application\*")

AND (adoptionOR deploy\*OR implementationOR integration)

AND (workloadOR "work reduction"OR load\*OR "cognitive load"OR demand\*OR time\*OR stress\*OR satisfactionOR usabilityOR workflowOR efficienc\*OR "work system"OR "work adaptation"OR turnaroundOR "clinician outcome"OR performance)

AND ("diagnos\*" OR "Magnetic Resonance Imaging"OR "MRI" OR "computer tomography"OR "imag\*" OR detect\*OR "data interpretation"OR "information system\*"OR "health information technology\*"OR "health IT\*"OR "medical informatics"OR "electronic health record\*"OR "medical record\*"OR "patient data")

## IEEE Xplore

*Note: Problems with more than 8 wildcards, therefore changes in search term*

*Filter: Journals, Magazines, Early Access Articles; 2000-[date]*

(hospital OR clinic OR healthcare OR "health care delivery" OR "clinical care" OR medical OR physician OR clinician OR doctor OR nurse OR physicians OR clinicians OR doctors OR nurses OR "health care professional" OR "patient care" OR patient OR patients OR surg\* OR oncology OR radiology OR "health information")

AND ("artificial intelligence" OR "machine intelligence" OR "machine learning" OR "deep learning" OR "neural network" OR "natural language processing" OR "AI" OR "automated image recognition" OR decision-support OR "AI application" OR "AI applications")

AND (adoption OR deploy\* OR implementation OR integration)

AND (workload OR "work reduction" OR load OR loads OR "cognitive load" OR demand OR time\* OR stress OR stressful OR stressing OR satisfaction OR usability OR workflow OR efficienc\* OR "work system" OR "work adaptation" OR turnaround OR "clinician outcome" OR performance)

AND ("diagnos\*" OR "Magnetic Resonance Imaging" OR "MRI" OR "computer tomography" OR "imag\*" OR detect\* OR "data interpretation" OR "information system" OR "health information technology" OR "health information technologies" OR "health IT" OR "medical informatics" OR "electronic health record" OR "medical record" OR "electronic health records" OR "medical records" OR "patient data")

## SUPPLEMENTARY NOTE 2: ADDITIONAL SEARCHES TO ASSESS POTENTIAL SELECTION BIAS

### dblp computer science bibliography

Note: More than two search terms resulted in a low number or no findings, therefore we conducted six very general searches. For the publication date, we filtered by using MS Excel on the exported records.

| NUMBER | SEARCH TERM                             |
|--------|-----------------------------------------|
| 1      | Artificial intelligence healthcare      |
| 2      | Artificial intelligence hospital        |
| 3      | Artificial intelligence medical imaging |
| 4      | Machine learning healthcare             |
| 5      | Machine learning hospital               |
| 6      | Machine learning medical imaging        |

### IEEE Xplore

*Filter: Conferences 2000-2023*

*Note: For the exact publication date, we filtered the column "Date added to IEEE Xplore" by using MS Excel on the exported records.*

(hospital OR clinic OR healthcare OR "health care delivery" OR "clinical care" OR medical OR physician OR clinician OR doctor OR nurse OR physicians OR clinicians OR doctors OR nurses OR "health care professional" OR "patient care" OR patient OR patients OR surg\* OR oncology OR radiology OR "health information")

AND ("artificial intelligence" OR "machine intelligence" OR "machine learning" OR "deep learning" OR "neural network" OR "natural language processing" OR "AI" OR "automated image recognition" OR decision-support OR "AI application" OR "AI applications")

AND (adoption OR deploy\* OR implementation OR integration)

AND (workload OR "work reduction" OR load OR loads OR "cognitive load" OR demand OR time\* OR stress OR stressful OR stressing OR satisfaction OR usability OR workflow OR efficienc\* OR "work system" OR "work adaptation" OR turnaround OR "clinician outcome" OR performance)

AND ("diagnos\*" OR "Magnetic Resonance Imaging" OR "MRI" OR "computer tomography" OR "imag\*" OR detect\* OR "data interpretation" OR "information system" OR "health information technology" OR "health information technologies" OR "health IT" OR "medical informatics" OR "electronic health record" OR "medical record" OR "electronic health records" OR "medical records" OR "patient data")

### Medical Image Computing and Computer Assisted Intervention (MICCAI)

The proceedings of the MICCAI conference are not searchable on Springer Link, therefore we retrieved the studies from <https://github.com/JunMa11/MICCAI-OpenSourcePapers>, drawing upon the Proceedings 2020 and the list of accepted Papers from 2021 and 2022.

## Hawaii International Conference on System Sciences (HICSS)

*Note: Search via AIS Library, which did not take the complete search strings therefore we adapted it.*

*Filter: 2020-2022*

(hospital OR clinic OR healthcare OR "health care delivery" OR "clinical care" OR medical OR physician OR clinician OR doctor OR nurse OR physicians OR clinicians OR doctors OR nurses OR "health care professional" OR "patient care" OR patient OR patients OR surg\* OR oncology OR radiology OR "health information")

AND ("artificial intelligence" OR "machine intelligence" OR "machine learning" OR "deep learning" OR "neural network" OR "natural language processing" OR "AI" OR "automated image recognition" OR decision-support OR "AI application" OR "AI applications")

AND (adoption OR deploy\* OR implementation OR integration)

AND (workload OR "work reduction" OR load OR loads OR "cognitive load" OR demand OR time\* OR stress OR stressful OR stressing OR satisfaction OR usability OR workflow OR efficienc\* OR "work system" OR "work adaptation" OR turnaround OR "clinician outcome" OR performance)
